# Supplementary material for: Secretome proteomics-based targeting of inter-alpha-trypsin inhibitor heavy chain H2 (ITIH2) and clusterin (Clu) mitigates p53 amyloid–mediated tumorigenesis in oral carcinoma
Source: Research Square preprint supplement (doi:10.21203/rs.3.rs-8727350/v1), 2026-02-19
Supplement: Supplementary file 1 [file 0914a18a3c410744e590b50e.docx]

**Supplementary Table 1.** Proteomics dataset listing all differentially expressed proteins identified in the mutant p53 secretome.

| **S. No** | **P value** | **Log2(fold_change)** | **Protein.Group** | **Protein.Ids** | **Protein.Names** | **Genes** |
| --- | --- | --- | --- | --- | --- | --- |
|  | 0.005364797 | 3.705997 | Q9C0B2 | Q9C0B2 | CFA74_HUMAN | CFAP74 |
|  | 0.010072324 | 3.289988 | P0C0L4;P0C0L5 | P0C0L4; P0C0L5 | CO4A_HUMAN;CO4B_HUMAN | C4A;C4B |
|  | 1.37028E-05 | 3.232625 | P02788 | P02788 | TRFL_HUMAN | LTF |
|  | 0.006155821 | 3.017692 | P09603 | P09603 | CSF1_HUMAN | CSF1 |
|  | 1.70394E-05 | 2.902442 | P02768 | P02768 | ALBU_HUMAN | ALB |
|  | 5.05375E-05 | 2.803819 | O00204 | O00204 | ST2B1_HUMAN | SULT2B1 |
|  | 9.21673E-07 | 2.693656 | Q8NDH2 | Q8NDH2 | CC168_HUMAN | CCDC168 |
|  | 0.000596709 | 2.680381 | P01023 | P01023 | A2MG_HUMAN | A2M |
|  | 0.000689562 | 2.61785 | P28799 | P28799 | GRN_HUMAN | GRN |
|  | 0.004817094 | 2.21807 | Q14118 | Q14118 | DAG1_HUMAN | DAG1 |
|  | 0.005980949 | 2.191399 | P19823 | P19823 | ITIH2_HUMAN | ITIH2 |
|  | 0.015371385 | 2.174271 | P31431 | P31431 | SDC4_HUMAN | SDC4 |
|  | 0.00223347 | 2.165546 | P08253 | P08253 | MMP2_HUMAN | MMP2 |
|  | 0.004509693 | 2.072349 | P53634 | P53634 | CATC_HUMAN | CTSC |
|  | 7.05082E-05 | 2.046673 | P01024 | P01024 | CO3_HUMAN | C3 |
|  | 0.003468014 | 1.97608 | P69905 | P69905 | HBA_HUMAN | HBA1 |
|  | 0.001366714 | 1.922025 | Q13867 | Q13867 | BLMH_HUMAN | BLMH |
|  | 0.001161249 | 1.899802 | P10909 | P10909 | CLUS_HUMAN | CLU |
|  | 0.002890054 | 1.89439 | Q12805 | Q12805 | FBLN3_HUMAN | EFEMP1 |
|  | 0.035298544 | 1.865514 | Q16270 | Q16270 | IBP7_HUMAN | IGFBP7 |
|  | 0.002849423 | 1.841954 | Q08380 | Q08380 | LG3BP_HUMAN | LGALS3BP |
|  | 0.019220303 | 1.797431 | P07686 | P07686 | HEXB_HUMAN | HEXB |
|  | 0.001125077 | 1.779356 | Q9H3G5 | Q9H3G5 | CPVL_HUMAN | CPVL |
|  | 0.005054849 | 1.774494 | O94985 | O94985 | CSTN1_HUMAN | CLSTN1 |
|  | 0.046017214 | 1.756269 | Q9BYK8 | Q9BYK8 | HELZ2_HUMAN | HELZ2 |
|  | 0.157247298 | 1.734164 | Q05639 | P62310 | EF1A2_HUMAN | EEF1A2 |
|  | 0.000133042 | 1.639307 | P03973 | P03973 | SLPI_HUMAN | SLPI |
|  | 0.074759104 | 1.544098 | P61916 | Q15181 | NPC2_HUMAN | NPC2 |
|  | 0.003612498 | 1.533111 | P18827 | P18827 | SDC1_HUMAN | SDC1 |
|  | 0.024949541 | 1.496917 | P09486 | P09486 | SPRC_HUMAN | SPARC |
|  | 0.008289694 | 1.46982 | P01008 | P01008 | ANT3_HUMAN | SERPINC1 |
|  | 0.027991444 | 1.465201 | Q9P0L0 | Q9P0L0 | VAPA_HUMAN | VAPA |
|  | 0.000346117 | 1.430066 | P07858 | P07858 | CATB_HUMAN | CTSB |
|  | 0.001632083 | 1.377429 | P23142 | P23142 | FBLN1_HUMAN | FBLN1 |
|  | 0.027040125 | 1.370041 | P02647 | P02647 | APOA1_HUMAN | APOA1 |
|  | 0.00969161 | 1.356033 | P13866;Q9NY91 | P13866;Q9NY91 | SC5A1_HUMAN;SC5A4_HUMAN | SLC5A1;SLC5A4 |
|  | 0.010077057 | 1.351347 | P04080 | P04080 | CYTB_HUMAN | CSTB |
|  | 0.060881176 | 1.348161 | O60888 | Q13404 | CUTA_HUMAN | CUTA |
|  | 0.163055843 | 1.336936 | P15291 | P25705 | B4GT1_HUMAN | B4GALT1 |
|  | 0.008832305 | 1.289966 | P08572 | P08572 | CO4A2_HUMAN | COL4A2 |
|  | 0.0014697 | 1.279342 | P07339 | P07339 | CATD_HUMAN | CTSD |
|  | 0.045518362 | 1.277483 | P09211 | P09211 | GSTP1_HUMAN | GSTP1 |
|  | 0.00209422 | 1.27229 | Q92820 | Q92820 | GGH_HUMAN | GGH |
|  | 0.038574587 | 1.22875 | P15586 | P15586 | GNS_HUMAN | GNS |
|  | 0.211607964 | 1.210524 | P00966 | P10619 | ASSY_HUMAN | ASS1 |
|  | 0.044146026 | 1.192057 | Q9UBR2 | Q9UBR2 | CATZ_HUMAN | CTSZ |
|  | 0.000961299 | 1.185371 | P07996 | P07996 | TSP1_HUMAN | THBS1 |
|  | 0.020264331 | 1.163507 | P16035 | P16035 | TIMP2_HUMAN | TIMP2 |
|  | 0.00463556 | 1.156917 | Q86WI1 | Q86WI1 | PKHL1_HUMAN | PKHD1L1 |
|  | 0.018597892 | 1.092532 | P62736;P63267;P68032 | P62736;P68032;P63267;P68133 | ACTA_HUMAN;ACTC_HUMAN;ACTH_HUMAN | ACTA2;ACTC1;ACTG2 |
|  | 0.159393692 | 1.088306 | P25705 | Q9Y266 | ATPA_HUMAN | ATP5F1A |
|  | 0.002584323 | 1.084664 | P02656 | P02656 | APOC3_HUMAN | APOC3 |
|  | 0.003852197 | 1.058437 | P01033 | P01033 | TIMP1_HUMAN | TIMP1 |
|  | 0.043402506 | 1.058249 | Q01469 | Q01469;A8MUU1 | FABP5_HUMAN | FABP5 |
|  | 0.004274846 | 1.057106 | P26368 | P26368 | U2AF2_HUMAN | U2AF2 |
|  | 0.149142728 | 1.003556 | P11047 | P12956 | LAMC1_HUMAN | LAMC1 |
|  | 0.187124814 | 1.003301 | P28066 | P23528;Q9Y281 | PSA5_HUMAN | PSMA5 |
|  | 0.04180987 | 0.98556 | Q9NY65 | Q71U36;Q9BQE3;P0DPH7;P0DPH8;Q6PEY2;Q9NY65 | TBA8_HUMAN | TUBA8 |
|  | 0.000132298 | 0.982188 | P07602 | P07602 | SAP_HUMAN | PSAP |
|  | 0.113892777 | 0.952585 | P00734 | O75608 | THRB_HUMAN | F2 |
|  | 0.078160538 | 0.948085 | Q6YHK3 | Q16531 | CD109_HUMAN | CD109 |
|  | 0.265281678 | 0.934261 | P00492 | P62937 | HPRT_HUMAN | HPRT1 |
|  | 0.004595502 | 0.919458 | P02751 | P02751 | FINC_HUMAN | FN1 |
|  | 0.258279625 | 0.909464 | P61769 | P62942 | B2MG_HUMAN | B2M |
|  | 0.002723411 | 0.90142 | P18065 | P18065 | IBP2_HUMAN | IGFBP2 |
|  | 0.06750224 | 0.89956 | P20962 | P22626 | PTMS_HUMAN | PTMS |
|  | 0.000129192 | 0.892238 | Q15582 | Q15582 | BGH3_HUMAN | TGFBI |
|  | 0.125680526 | 0.87951 | P15311 | iRT_peptide6 | EZRI_HUMAN | EZR |
|  | 0.133548456 | 0.850988 | P09651;Q32P51 | P11021;P0DMV8;P0DMV9;P34931;P54652;P11142 | RA1L2_HUMAN;ROA1_HUMAN | HNRNPA1;HNRNPA1L2 |
|  | 0.03990708 | 0.768384 | P52209 | P52209 | 6PGD_HUMAN | PGD |
|  | 0.020493522 | 0.763759 | P07093 | P07093 | GDN_HUMAN | SERPINE2 |
|  | 0.13051331 | 0.748442 | P63241;Q6IS14;Q9GZV4 | P04908;Q93077;P20671;Q96KK5;Q99878;P0C0S8;Q6FI13;Q16777;Q7L7L0;Q9BTM1 | IF5A1_HUMAN;IF5A2_HUMAN;IF5AL_HUMAN | EIF5A;EIF5A2;EIF5AL1 |
|  | 0.00537289 | 0.744325 | P12109 | P12109 | CO6A1_HUMAN | COL6A1 |
|  | 0.003226169 | 0.735006 | O00391 | O00391 | QSOX1_HUMAN | QSOX1 |
|  | 0.00187808 | 0.733129 | P16070 | P16070 | CD44_HUMAN | CD44 |
|  | 0.040218087 | 0.726879 | P24534 | P24534 | EF1B_HUMAN | EEF1B2 |
|  | 0.280110221 | 0.714748 | P02774 | P35527 | VTDB_HUMAN | GC |
|  | 0.094367604 | 0.712672 | P05783;P08727 | P23526 | K1C18_HUMAN;K1C19_HUMAN | KRT18;KRT19 |
|  | 0.38718133 | 0.70433 | P55209 | Q562R1 | NP1L1_HUMAN | NAP1L1 |
|  | 0.211415235 | 0.687724 | P10619 | P11586 | PPGB_HUMAN | CTSA |
|  | 0.050022148 | 0.68263 | P01034 |  | CYTC_HUMAN | CST3 |
|  | 0.000128425 | 0.679396 | P00558 | P00558 | PGK1_HUMAN | PGK1 |
|  | 0.069742272 | 0.636463 | P07355 | O00410 | ANXA2_HUMAN | ANXA2 |
|  | 0.329228206 | 0.605114 | P39687 | P15121 | AN32A_HUMAN | ANP32A |
|  | 0.04972927 | 0.597738 | Q9HC38 | Q9HC38 | GLOD4_HUMAN | GLOD4 |
|  | 0.077405977 | 0.585006 | Q16531 | P55786 | DDB1_HUMAN | DDB1 |
|  | 0.030063818 | 0.580831 | P14174 | P14174 | MIF_HUMAN | MIF |
|  | 0.334068798 | 0.580417 | P40227 | P39687;O43423 | TCPZ_HUMAN | CCT6A |
|  | 0.012704894 | 0.559141 | Q16555 | Q14194;Q16555 | DPYL2_HUMAN | DPYSL2 |
|  | 0.276694443 | 0.538439 | P35527 | Q9NTK5 | K1C9_HUMAN | KRT9 |
|  | 0.058338201 | 0.521348 | Q15366 | O43707 | PCBP2_HUMAN | PCBP2 |
|  | 0.175188472 | 0.504764 | P25789 | P49368 | PSA4_HUMAN | PSMA4 |
|  | 0.039736166 | 0.500501 | P62318 | P62318 | SMD3_HUMAN | SNRPD3 |
|  | 0.006340952 | 0.491683 | P26038 | P15311;P26038;P35241 | MOES_HUMAN | MSN |
|  | 0.146076206 | 0.489186 | O60361 | P62258 | NDK8_HUMAN | NME2P1 |
|  | 0.104698847 | 0.485023 | P42330 | Q58FF8;Q14568;P07900;P08238 | AK1C3_HUMAN | AKR1C3 |
|  | 0.597581704 | 0.477565 | P05141 | P27348 | ADT2_HUMAN | SLC25A5 |
|  | 0.100453126 | 0.472619 | P51858 | P55072 | HDGF_HUMAN | HDGF |
|  | 0.208241688 | 0.471647 | P62857 | P50991 | RS28_HUMAN | RPS28 |
|  | 0.300101824 | 0.466301 | P06737 | P18206 | PYGL_HUMAN | PYGL |
|  | 0.270288569 | 0.462649 | P20618 | P00492 | PSB1_HUMAN | PSMB1 |
|  | 0.044331109 | 0.438933 | P04439 | P04439;P01889;P13747;P17693;P01893 | HLAA_HUMAN | HLA-A |
|  | 0.193844253 | 0.425258 | P63244 | P28072 | RACK1_HUMAN | RACK1 |
|  | 0.55836532 | 0.420323 | P61204;P84077;P84085 | Q06323 | ARF1_HUMAN;ARF3_HUMAN;ARF5_HUMAN | ARF1;ARF3;ARF5 |
|  | 0.01180155 | 0.416294 | P15531 | O60361;P15531;P22392 | NDKA_HUMAN | NME1 |
|  | 0.003826696 | 0.4057 | P48643 | P48643 | TCPE_HUMAN | CCT5 |
|  | 0.153719501 | 0.405061 | P07437 | P11047 | TBB5_HUMAN | TUBB |
|  | 0.429785226 | 0.396958 | P26639 | Q9H0I9 | SYTC_HUMAN | TARS1 |
|  | 0.180425291 | 0.394139 | P23528 | P25789 | COF1_HUMAN | CFL1 |
|  | 0.591113784 | 0.389404 | P37802 | O00764 | TAGL2_HUMAN | TAGLN2 |
|  | 0.295709537 | 0.387453 | Q01518 | P07737 | CAP1_HUMAN | CAP1 |
|  | 0.018604012 | 0.383242 | P0DMV8;P0DMV9 | P0DMV8;P0DMV9 | HS71A_HUMAN;HS71B_HUMAN | HSPA1A;HSPA1B |
|  | 0.462200502 | 0.375416 | P25788 | Q12841 | PSA3_HUMAN | PSMA3 |
|  | 0.25829472 | 0.353272 | P62937 | P61769 | PPIA_HUMAN | PPIA |
|  | 0.437596161 | 0.351694 | P07711 | P26639 | CATL1_HUMAN | CTSL |
|  | 0.020107008 | 0.3304 | P06733 | P06733 | ENOA_HUMAN | ENO1 |
|  | 0.031478731 | 0.322957 | P18669 | P18669 | PGAM1_HUMAN | PGAM1 |
|  | 0.135098445 | 0.315687 | P00441 | Q32P51;P09651 | SODC_HUMAN | SOD1 |
|  | 0.169697454 | 0.311037 | A0A1B0GUS4;P68036 | P15291 | UB2L3_HUMAN;UB2L5_HUMAN | UBE2L3;UBE2L5 |
|  | 0.69645666 | 0.30666 | P52272 | Q9BRA2 | HNRPM_HUMAN | HNRNPM |
|  | 0.284889513 | 0.306035 | P38159;Q96E39 | P02774 | RBMX_HUMAN;RMXL1_HUMAN | RBMX;RBMXL1 |
|  | 0.191042579 | 0.304988 | P28072 | P61981 | PSB6_HUMAN | PSMB6 |
|  | 0.450052554 | 0.301122 | Q99873 | P60709;P63261 | ANM1_HUMAN | PRMT1 |
|  | 0.741971183 | 0.295072 | P13797 | Q00610 | PLST_HUMAN | PLS3 |
|  | 0.271908274 | 0.289568 | Q9NTK5 | P20618 | OLA1_HUMAN | OLA1 |
|  | 0.619445982 | 0.282932 | O95716;P20336;P20337;P20338;P61006;P61018;P61026;P61106;P62820;Q15286;Q15771;Q6IQ22;Q86YS6;Q92928;Q92930;Q96AX2;Q96DA2;Q96E17;Q9H0U4 | P04075 | RAB10_HUMAN;RAB12_HUMAN;RAB14_HUMAN;RAB1A_HUMAN;RAB1B_HUMAN;RAB1C_HUMAN;RAB30_HUMAN;RAB35_HUMAN;RAB37_HUMAN;RAB3A_HUMAN;RAB3B_HUMAN;RAB3C_HUMAN;RAB3D_HUMAN;RAB43_HUMAN;RAB4A_HUMAN;RAB4B_HUMAN;RAB8A_HUMAN;RAB8B_HUMAN;RB39B_HUMAN | RAB10;RAB12;RAB14;RAB1A;RAB1B;RAB1C;RAB30;RAB35;RAB37;RAB39B;RAB3A;RAB3B;RAB3C;RAB3D;RAB43;RAB4A;RAB4B;RAB8A;RAB8B |
|  | 0.375891825 | 0.281349 | P15559 | P13489 | NQO1_HUMAN | NQO1 |
|  | 0.584881858 | 0.269052 | O00764 | P17987 | PDXK_HUMAN | PDXK |
|  | 0.356580975 | 0.25667 | P63279 | P49327 | UBC9_HUMAN | UBE2I |
|  | 0.722521917 | 0.246305 | Q00610 | Q9NQH7 | CLH1_HUMAN | CLTC |
|  | 0.19892773 | 0.228868 | P50991 | iRT_peptide2 | TCPD_HUMAN | CCT4 |
|  | 0.317687293 | 0.227397 | P15121 | P35579 | ALDR_HUMAN | AKR1B1 |
|  | 0.13121811 | 0.22647 | P11142 | P63241;Q9GZV4;Q6IS14 | HSP7C_HUMAN | HSPA8 |
|  | 0.757375778 | 0.218265 | P06454 | Q04917 | PTMA_HUMAN | PTMA |
|  | 0.456011402 | 0.207997 | P78417 | P50502;Q8NFI4;Q8IZP2 | GSTO1_HUMAN | GSTO1 |
|  | 0.395671714 | 0.207297 | P68371 | Q99497 | TBB4B_HUMAN | TUBB4B |
|  | 0.236444248 | 0.204962 | P21333 | O00487 | FLNA_HUMAN | FLNA |
|  | 0.076532469 | 0.197325 | P55786 | P61916 | PSA_HUMAN | NPEPPS |
|  | 0.310055217 | 0.194132 | P12004 | P06737 | PCNA_HUMAN | PCNA |
|  | 0.067136133 | 0.192642 | P22626 | P26641 | ROA2_HUMAN | HNRNPA2B1 |
|  | 0.549605249 | 0.190972 | O00299 | P62805 | CLIC1_HUMAN | CLIC1 |
|  | 0.012491552 | 0.183912 | Q06830 | Q06830 | PRDX1_HUMAN | PRDX1 |
|  | 0.823670602 | 0.182893 | Q9H4A4 | P09871 | AMPB_HUMAN | RNPEP |
|  | 0.057372852 | 0.175167 | O43707 | O15347 | ACTN4_HUMAN | ACTN4 |
|  | 0.592473616 | 0.174241 | Q13442 | P37802 | HAP28_HUMAN | PDAP1 |
|  | 0.600683265 | 0.172865 | Q9NUN7 | P02786 | ACER3_HUMAN | ACER3 |
|  | 0.476111011 | 0.171996 | P20700 | P25788 | LMNB1_HUMAN | LMNB1 |
|  | 0.532892467 | 0.16792 | P06703 | P16949 | S10A6_HUMAN | S100A6 |
|  | 0.089404014 | 0.15675 | P23526 | P31946 | SAHH_HUMAN | AHCY |
|  | 0.605674119 | 0.155394 | P14324 | Q9NUN7 | FPPS_HUMAN | FDPS |
|  | 0.351155479 | 0.13819 | P60174 | P35232 | TPIS_HUMAN | TPI1 |
|  | 0.556022729 | 0.132042 | Q06323 | P07108 | PSME1_HUMAN | PSME1 |
|  | 0.497725353 | 0.124788 | P06748 | P04732;P13640;Q8N339;P80297;P02795 | NPM_HUMAN | NPM1 |
|  | 0.446062804 | 0.118379 | P60709;P63261 | P07711 | ACTB_HUMAN;ACTG_HUMAN | ACTB;ACTG1 |
|  | 0.696015587 | 0.116355 | Q9BRA2 | P08195 | TXD17_HUMAN | TXNDC17 |
|  | 0.779469976 | 0.112704 | P10599 | P12081 | THIO_HUMAN | TXN |
|  | 0.699787384 | 0.105987 | P33316 | Q15631 | DUT_HUMAN | DUT |
|  | 0.408297231 | 0.093461 | P62826 | P11216 | RAN_HUMAN | RAN |
|  | 0.712211825 | 0.091874 | P55854;P61956;Q6EEV6 | P33316 | SUMO2_HUMAN;SUMO3_HUMAN;SUMO4_HUMAN | SUMO2;SUMO3;SUMO4 |
|  | 0.628058673 | 0.085224 | P04406 | P63104 | G3P_HUMAN | GAPDH |
|  | 0.790654884 | 0.083856 | Q15365 | P09382 | PCBP1_HUMAN | PCBP1 |
|  | 0.521610095 | 0.082701 | P16949 | P00390 | STMN1_HUMAN | STMN1 |
|  | 0.597608317 | 0.082071 | P02786 | P05141 | TFR1_HUMAN | TFRC |
|  | 0.896128915 | 0.081312 | Q9Y4K0 | Q13451 | LOXL2_HUMAN | LOXL2 |
|  | 0.867352244 | 0.080968 | Q9H299 | P26447 | SH3L3_HUMAN | SH3BGRL3 |
|  | 0.852070569 | 0.074629 | Q99436 | Q14847 | PSB7_HUMAN | PSMB7 |
|  | 0.513761822 | 0.069742 | P32119 | P12814;P35609 | PRDX2_HUMAN | PRDX2 |
|  | 0.89522091 | 0.061868 | Q13451 | P35637;Q92804 | FKBP5_HUMAN | FKBP5 |
|  | 0.895198306 | 0.055673 | P35637;Q92804 | P78371 | FUS_HUMAN;RBP56_HUMAN | FUS;TAF15 |
|  | 0.931307649 | 0.050665 | Q15843 | Q6GMV3 | NEDD8_HUMAN | NEDD8 |
|  | 0.695493049 | 0.048454 | P08195 | O15511 | 4F2_HUMAN | SLC3A2 |
|  | 0.627402262 | 0.044509 | P63104 | P61026;Q6IQ22;P61106;P62820;Q9H0U4;Q92928;Q15771;Q15286;Q96AX2;P20336;P20337;Q96E17;O95716;Q86YS6;P20338;P61018;P61006;Q92930;Q96DA2 | 1433Z_HUMAN | YWHAZ |
|  | 0.941046604 | 0.032574 | P55327 | Q16719 | TPD52_HUMAN | TPD52 |
|  | 0.912516644 | 0.029576 | P0DP23;P0DP24;P0DP25 | Q71U36;P68363;Q9BQE3;P0DPH7;P0DPH8;Q6PEY2;P68366;Q9NY65 | CALM1_HUMAN;CALM2_HUMAN;CALM3_HUMAN | CALM1;CALM2;CALM3 |
|  | 0.956337412 | 0.025111 | O75347 | Q8N165 | TBCA_HUMAN | TBCA |
|  | 0.616096632 | 0.02286 | P04075 | P14324 | ALDOA_HUMAN | ALDOA |
|  | 0.983591759 | 0.005123 | P0CG47;P0CG48;P62979;P62987 | P00338 | RL40_HUMAN;RS27A_HUMAN;UBB_HUMAN;UBC_HUMAN | RPS27A;UBA52;UBB;UBC |
|  | 0.988044018 | 0.003399 | P30086 | P62987;P62979;P0CG47;P0CG48 | PEBP1_HUMAN | PEBP1 |
|  | 0.999151828 | 0.000737 | P00403 | O14818 | COX2_HUMAN | MT-CO2 |
|  | 0.997178742 | 0.000552 | O14818 | P30086 | PSA7_HUMAN | PSMA7 |
|  | 0.979414382 | -0.00357 | P00338 | P31948 | LDHA_HUMAN | LDHA |
|  | 0.961416622 | -0.01207 | P17174 | O75347 | AATC_HUMAN | GOT1 |
|  | 0.970549005 | -0.01215 | P31948 | P17174 | STIP1_HUMAN | STIP1 |
|  | 0.844101792 | -0.02096 | Q14847 | P27695 | LASP1_HUMAN | LASP1 |
|  | 0.859748611 | -0.02445 | P26447 | Q99436 | S10A4_HUMAN | S100A4 |
|  | 0.890019195 | -0.02874 | P78371 | P37837 | TCPB_HUMAN | CCT2 |
|  | 0.910534934 | -0.03049 | P68363 | Q9Y4K0 | TBA1B_HUMAN | TUBA1B |
|  | 0.718922292 | -0.03149 | Q9NQH7 | P61956;P55854;Q6EEV6 | XPP3_HUMAN | XPNPEP3 |
|  | 0.745063718 | -0.03572 | P50395 | P13797 | GDIB_HUMAN | GDI2 |
|  | 0.782939814 | -0.04027 | P04264 | P10599 | K2C1_HUMAN | KRT1 |
|  | 0.913038603 | -0.04501 | Q6GMV3 | P27482;P0DP23;P0DP24;P0DP25 | PTRD1_HUMAN | PTRHD1 |
|  | 0.669186604 | -0.04549 | P34932 | P06744 | HSP74_HUMAN | HSPA4 |
|  | 0.873214411 | -0.04579 | P37837 | Q9H299 | TALDO_HUMAN | TALDO1 |
|  | 0.936340272 | -0.05044 | Q16719 | Q15843 | KYNU_HUMAN | KYNU |
|  | 0.786165477 | -0.05435 | P09382 | P04264;P04259 | LEG1_HUMAN | LGALS1 |
|  | 0.292591541 | -0.06778 | P07737 | Q15149 | PROF1_HUMAN | PFN1 |
|  | 0.635943086 | -0.07821 | P06744 | P04406 | G6PI_HUMAN | GPI |
|  | 0.391784305 | -0.08368 | P07195 | P55209 | LDHB_HUMAN | LDHB |
|  | 0.479870711 | -0.08443 | P13639 | P20700 | EF2_HUMAN | EEF2 |
|  | 0.566490944 | -0.089 | P17987 | P84077;P61204;P84085 | TCPA_HUMAN | TCP1 |
|  | 0.407662272 | -0.09151 | P11216 | Q96KP4 | PYGB_HUMAN | PYGB |
|  | 0.375380136 | -0.09699 | P13489 | iRT_peptide5 | RINI_HUMAN | RNH1 |
|  | 0.836376336 | -0.10652 | P27695 | Q9H4A4 | APEX1_HUMAN | APEX1 |
|  | 0.759128117 | -0.10986 | P12081 | P06454 | HARS1_HUMAN | HARS1 |
|  | 0.542722913 | -0.11488 | P60842 | P31153 | IF4A1_HUMAN | EIF4A1 |
|  | 0.951612953 | -0.1225 | Q8N165 | P55327 | PDK1L_HUMAN | PDIK1L |
|  | 0.109935686 | -0.1232 | P06753 | P40925 | TPM3_HUMAN | TPM3 |
|  | 0.392206697 | -0.12499 | Q99497 | Q6ZMR3;P00338;P07195;P07864 | PARK7_HUMAN | PARK7 |
|  | 0.454262547 | -0.12701 | P50502;Q8IZP2 | Q99873 | F10A1_HUMAN;ST134_HUMAN | ST13;ST13P4 |
|  | 0.025642077 | -0.13382 | P29401 | P29401 | TKT_HUMAN | TKT |
|  | 0.402954658 | -0.13529 | P08865 | P68371 | RSSA_HUMAN | RPSA |
|  | 0.684860694 | -0.13929 | O15511 | Q07021 | ARPC5_HUMAN | ARPC5 |
|  | 0.137567736 | -0.14017 | P62258 | P00441 | 1433E_HUMAN | YWHAE |
|  | 0.103482786 | -0.14026 | P08238 | P10809 | HS90B_HUMAN | HSP90AB1 |
|  | 0.752205875 | -0.14092 | Q04917 | P50395 | 1433F_HUMAN | YWHAH |
|  | 0.699476331 | -0.14221 | Q15631 | P52272 | TSN_HUMAN | TSN |
|  | 0.544828513 | -0.14987 | P62805 | P60660 | H4_HUMAN | H4C1 |
|  | 0.288640081 | -0.16753 | Q15149 | P38159;Q96E39 | PLEC_HUMAN | PLEC |
|  | 0.553284949 | -0.16995 | P07108 | O00299 | ACBP_HUMAN | DBI |
|  | 0.369047365 | -0.17108 | P07900 | Q16658 | HS90A_HUMAN | HSP90AA1 |
|  | 0.098090625 | -0.17967 | P55072 | P30041 | TERA_HUMAN | VCP |
|  | 0.458557241 | -0.19558 | Q12841 | P78417 | FSTL1_HUMAN | FSTL1 |
|  | 0.52124323 | -0.19891 | P00390 | P32119 | GSHR_HUMAN | GSR |
|  | 0.373811514 | -0.19992 | Q9Y5S9 | P07900 | RBM8A_HUMAN | RBM8A |
|  | 0.29677719 | -0.20975 | P18206 | Q01518 | VINC_HUMAN | VCL |
|  | 0.356725599 | -0.2132 | P50990 | P63279 | TCPQ_HUMAN | CCT8 |
|  | 0.51209738 | -0.21763 | P12814 | iRT_peptide7 | ACTN1_HUMAN | ACTN1 |
|  | 0.593945123 | -0.22021 | P27348 | Q13442 | 1433T_HUMAN | YWHAQ |
|  | 0.380330197 | -0.23244 | Q562R1 | P15559 | ACTBL_HUMAN | ACTBL2 |
|  | 0.108460177 | -0.23245 | P40925 | Q04828;P52895;P42330 | MDHC_HUMAN | MDH1 |
|  | 0.423860595 | -0.23456 | Q9H0I9 | O75369 | TKTL2_HUMAN | TKTL2 |
|  | 0.82338554 | -0.23975 | P09871 | Q15365 | C1S_HUMAN | C1S |
|  | 0.35257235 | -0.241 | P49327 | P60174 | FAS_HUMAN | FASN |
|  | 0.015375155 | -0.246 | P09429 | P09429 | HMGB1_HUMAN | HMGB1 |
|  | 0.363683962 | -0.2655 | Q16658 | P50990 | FSCN1_HUMAN | FSCN1 |
|  | 0.086423061 | -0.2692 | P31946 | P56537 | 1433B_HUMAN | YWHAB |
|  | 0.238920087 | -0.28146 | P62942 | P21333 | FKB1A_HUMAN | FKBP1A |
|  | 0.024033489 | -0.28687 | P29692 | P29692 | EF1D_HUMAN | EEF1D |
|  | 0.062697457 | -0.28755 | P14618 | P35908 | KPYM_HUMAN | PKM |
|  | 0.672592469 | -0.29049 | Q07021 | P34932 | C1QBP_HUMAN | C1QBP |
|  | 0.043025863 | -0.29267 | P60981 | P60981 | DEST_HUMAN | DSTN |
|  | 0.374714188 | -0.30266 | iRT_peptide5 | Q9Y5S9 |  |  |
|  | 0.006740585 | -0.3053 | P19338 | P19338 | NUCL_HUMAN | NCL |
|  | 0.233203118 | -0.31198 | P48741 | Q12931 | HSP77_HUMAN | HSPA7 |
|  | 0.196509266 | -0.31404 | iRT_peptide2 | P63244 |  |  |
|  | 0.503236582 | -0.31654 | iRT_peptide7 | P06748 |  |  |
|  | 0.175044682 | -0.33271 | P49368 | P48507 | TCPG_HUMAN | CCT3 |
|  | 0.096076396 | -0.33518 | P30041 | iRT_peptide9 | PRDX6_HUMAN | PRDX6 |
|  | 0.079065472 | -0.34804 | P60900 | Q6YHK3 | PSA6_HUMAN | PSMA6 |
|  | 0.542983901 | -0.35352 | P60660 | P60842;Q14240 | MYL6_HUMAN | MYL6 |
|  | 0.215806278 | -0.36301 | P43490 | iRT_peptide8 | NAMPT_HUMAN | NAMPT |
|  | 0.065767021 | -0.37278 | P26641 | P09972 | EF1G_HUMAN | EEF1G |
|  | 0.5359046 | -0.37462 | P31153 | P06703 | METK2_HUMAN | MAT2A |
|  | 0.044688502 | -0.37515 | P25786 | P25786 | PSA1_HUMAN | PSMA1 |
|  | 0.033478566 | -0.37729 | P23396 | P23396 | RS3_HUMAN | RPS3 |
|  | 0.41339191 | -0.38956 | O75369 | P62826 | FLNB_HUMAN | FLNB |
|  | 0.485729394 | -0.38961 | P02795;P04732;P13640;P80297;Q8N339 | P13639 | MT1E_HUMAN;MT1G_HUMAN;MT1M_HUMAN;MT1X_HUMAN;MT2_HUMAN | MT1E;MT1G;MT1M;MT1X;MT2A |
|  | 0.187907434 | -0.40147 | P61981 | P28066 | 1433G_HUMAN | YWHAG |
|  | 0.094521331 | -0.41435 | P53396 | P05783;P08727 | ACLY_HUMAN | ACLY |
|  | 0.236278087 | -0.43733 | O00487 | P17066;P48741 | PSDE_HUMAN | PSMD14 |
|  | 0.038843351 | -0.43777 | P52565 | P52565 | GDIR1_HUMAN | ARHGDIA |
|  | 0.060689582 | -0.43851 | Q13404 | Q15366;P57721 | UB2V1_HUMAN | UBE2V1 |
|  | 0.310107799 | -0.43949 | P35579 | P12004 | MYH9_HUMAN | MYH9 |
|  | 0.00714045 | -0.44199 | P68104;Q5VTE0 | P68104;Q5VTE0 | EF1A1_HUMAN;EF1A3_HUMAN | EEF1A1;EEF1A1P5 |
|  | 0.002685537 | -0.44536 | Q01105 | P0DME0;Q01105 | SET_HUMAN | SET |
|  | 0.041054054 | -0.44564 | B2RXH8;B7ZW38;O60812;P07910;P0DMR1 | O60812;B2RXH8;B7ZW38;P0DMR1;P07910 | HNRC1_HUMAN;HNRC2_HUMAN;HNRC3_HUMAN;HNRC4_HUMAN;HNRPC_HUMAN | HNRNPC;HNRNPCL1;HNRNPCL2;HNRNPCL3;HNRNPCL4 |
|  | 0.009213355 | -0.44681 | P02545 | P02545 | LMNA_HUMAN | LMNA |
|  | 0.128529461 | -0.45895 | P04908;P0C0S8;P20671;Q7L7L0;Q93077;Q96KK5;Q99878;Q9BTM1 | P15311 | H2A1B_HUMAN;H2A1C_HUMAN;H2A1D_HUMAN;H2A1H_HUMAN;H2A1J_HUMAN;H2A1_HUMAN;H2A3_HUMAN;H2AJ_HUMAN | H2AC11;H2AC12;H2AC14;H2AC4;H2AC6;H2AC7;H2AJ;H2AW |
|  | 0.035315232 | -0.4606 | P05387 | P05387 | RLA2_HUMAN | RPLP2 |
|  | 0.210398896 | -0.4697 | P11586 | P54819 | C1TC_HUMAN | MTHFD1 |
|  | 0.073991413 | -0.48464 | Q15181 | P59998 | IPYR_HUMAN | PPA1 |
|  | 0.155702942 | -0.50705 | P62310 | P22314 | LSM3_HUMAN | LSM3 |
|  | 0.070971922 | -0.52472 | P59998 | P07355 | ARPC4_HUMAN | ARPC4 |
|  | 0.155197438 | -0.55375 | P22314 | P04350;P68371;P07437 | UBA1_HUMAN | UBA1 |
|  | 0.02934471 | -0.55422 | Q14554 | Q14554 | PDIA5_HUMAN | PDIA5 |
|  | 0.063039635 | -0.56857 | P09972 | P14618 | ALDOC_HUMAN | ALDOC |
|  | 0.094788143 | -0.59021 | iRT_peptide9 | P53396 |  |  |
|  | 0.113144424 | -0.59326 | O75608 | P06753 | LYPA1_HUMAN | LYPLA1 |
|  | 0.013563525 | -0.59721 | P23284 | P23284 | PPIB_HUMAN | PPIB |
|  | 0.209913996 | -0.59906 | P54819 | P62857 | KAD2_HUMAN | AK2 |
|  | 0.343553289 | -0.60091 | P35232 | P40227 | PHB_HUMAN | PHB |
|  | 0.115562889 | -0.61823 | P25398 | P00734 | RS12_HUMAN | RPS12 |
|  | 0.079992954 | -0.6212 | P56537 | P60900 | IF6_HUMAN | EIF6 |
|  | 0.000556281 | -0.62665 | Q16881 | Q16881 | TRXR1_HUMAN | TXNRD1 |
|  | 0.055579691 | -0.6308 | O15347 | Q8NHW5;P05388 | HMGB3_HUMAN | HMGB3 |
|  | 0.007338715 | -0.63334 | Q92688 | Q92688 | AN32B_HUMAN | ANP32B |
|  | 0.009738332 | -0.65304 | Q9UQ80 | Q9UQ80 | PA2G4_HUMAN | PA2G4 |
|  | 0.001403705 | -0.65649 | P08670 | P08670 | VIME_HUMAN | VIM |
|  | 0.158941066 | -0.65913 | Q9Y266 | Q05639 | NUDC_HUMAN | NUDC |
|  | 0.406811614 | -0.66105 | Q96KP4 | P08865 | CNDP2_HUMAN | CNDP2 |
|  | 0.068498859 | -0.67461 | O00410 | P20962 | IPO5_HUMAN | IPO5 |
|  | 0.060945331 | -0.71453 | P35908 | O60888 | K22E_HUMAN | KRT2 |
|  | 0.044557836 | -0.76677 | Q9UK76 | Q9UK76 | JUPI1_HUMAN | JPT1 |
|  | 0.027771253 | -0.77238 | P16402 | P16402 | H13_HUMAN | H1-3 |
|  | 0.021078687 | -0.81699 | P61978 | P61978 | HNRPK_HUMAN | HNRNPK |
|  | 0.100619264 | -0.83203 | P10809 | P51858 | CH60_HUMAN | HSPD1 |
|  | 0.054273873 | -0.83806 | P05388;Q8NHW5 | P01034 | RLA0L_HUMAN;RLA0_HUMAN | RPLP0;RPLP0P6 |
|  | 0.001401457 | -0.84413 | P49411 | P49411 | EFTU_HUMAN | TUFM |
|  | 0.214001521 | -0.8445 | iRT_peptide8 | P00966 |  |  |
|  | 0.020698227 | -0.84637 | P61604 | P61604 | CH10_HUMAN | HSPE1 |
|  | 0.11908641 | -0.86209 | iRT_peptide6 | P25398 |  |  |
|  | 0.012449856 | -0.8675 | A0A2R8Y619;O60814;P06899;P23527;P33778;P57053;P58876;P62807;Q16778;Q5QNW6;Q8N257;Q93079;Q96A08;Q99877;Q99879;Q99880 | Q96A08;P33778;P62807;P58876;Q93079;P06899;O60814;Q99880;Q99879;Q99877;P23527;Q16778;Q5QNW6;Q8N257;A0A2R8Y619;P57053 | H2B1A_HUMAN;H2B1B_HUMAN;H2B1C_HUMAN;H2B1D_HUMAN;H2B1H_HUMAN;H2B1J_HUMAN;H2B1K_HUMAN;H2B1L_HUMAN;H2B1M_HUMAN;H2B1N_HUMAN;H2B1O_HUMAN;H2B2E_HUMAN;H2B2F_HUMAN;H2B3B_HUMAN;H2BE1_HUMAN;H2BFS_HUMAN | H2BC1;H2BC11;H2BC12;H2BC13;H2BC14;H2BC15;H2BC17;H2BC18;H2BC21;H2BC3;H2BC4;H2BC5;H2BC9;H2BE1;H2BS1;H2BU1 |
|  | 0.009797025 | -0.8684 | Q9UL46 | Q9UL46 | PSME2_HUMAN | PSME2 |
|  | 0.000584288 | -0.88887 | Q02790 | Q02790 | FKBP4_HUMAN | FKBP4 |
|  | 0.029249783 | -0.9131 | P55060 | P55060 | XPO2_HUMAN | CSE1L |
|  | 0.006802374 | -0.95189 | P40926 | P40926 | MDHM_HUMAN | MDH2 |
|  | 0.001646853 | -0.97451 | Q14103 | Q14103 | HNRPD_HUMAN | HNRNPD |
|  | 0.024000205 | -1.01742 | P58546 | P58546 | MTPN_HUMAN | MTPN |
|  | 0.146088279 | -1.02471 | P12956 | O60361 | XRCC6_HUMAN | XRCC6 |
|  | 0.016410707 | -1.12879 | Q12904 | Q12904 | AIMP1_HUMAN | AIMP1 |
|  | 0.012056134 | -1.18207 | P61088;Q5JXB2 | P61088;Q5JXB2 | UBE2N_HUMAN;UE2NL_HUMAN | UBE2N;UBE2NL |
|  | 0.011638726 | -1.2111 | P30101 | P30101 | PDIA3_HUMAN | PDIA3 |
|  | 0.012161532 | -1.22936 | E9PAV3;Q13765 | E9PAV3;Q13765 | NACAM_HUMAN;NACA_HUMAN | NACA |
|  | 0.022935008 | -1.23283 | P60903 | P60903 | S10AA_HUMAN | S100A10 |
|  | 0.006279634 | -1.23766 | P13645 | P13645 | K1C10_HUMAN | KRT10 |
|  | 0.023432786 | -1.2383 | Q96RY7 | Q96RY7 | IF140_HUMAN | IFT140 |
|  | 0.007995683 | -1.33271 | Q96AE4 | Q96AE4 | FUBP1_HUMAN | FUBP1 |
|  | 0.019712295 | -1.33483 | Q9NQC3 | Q9NQC3 | RTN4_HUMAN | RTN4 |
|  | 0.170221974 | -1.34188 | P48507 | P68036;A0A1B0GUS4 | GSH0_HUMAN | GCLM |
|  | 0.000160943 | -1.36639 | P11021 | P11021 | BIP_HUMAN | HSPA5 |
|  | 0.036838873 | -1.43472 | P16401 | P16401 | H15_HUMAN | H1-5 |
|  | 0.014505852 | -1.48151 | P55884 | P55884 | EIF3B_HUMAN | EIF3B |
|  | 0.024578408 | -1.51858 | P62263 | P62263 | RS14_HUMAN | RPS14 |
|  | 0.034932501 | -1.6106 | Q9UHD8 | Q9UHD8 | SEPT9_HUMAN | SEPTIN9 |
|  | 0.013913806 | -1.63705 | P14625 | P14625 | ENPL_HUMAN | HSP90B1 |
|  | 0.008306667 | -1.74359 | Q09666 | Q09666 | AHNK_HUMAN | AHNAK |
|  | 0.231862443 | -1.84532 | Q12931 | P43490 | TRAP1_HUMAN | TRAP1 |
|  | 0.010229972 | -2.25254 | Q15084 | Q15084 | PDIA6_HUMAN | PDIA6 |
|  | 0.016424195 | -2.51727 | Q8TEW8 | Q8TEW8 | PAR3L_HUMAN | PARD3B |

**Supplementary Table 2.** Proteomics dataset summarizes the significantly altered proteins in the p53-mutant secretome, identified through statistical filtering (p < 0.05, fold-change cutoff)

| **S. No.** | **P value** | **Log2(fold_change)** | **Protein.Group** | **Protein.Ids** | **Protein.Names** | **Genes** |
| --- | --- | --- | --- | --- | --- | --- |
|  | 0.005365 | 3.705997 | Q9C0B2 | Q9C0B2 | CFA74_HUMAN | CFAP74 |
|  | 0.010072 | 3.289988 | P0C0L4;P0C0L5 | P0C0L4;P0C0L5 | CO4A_HUMAN;CO4B_HUMAN | C4A;C4B |
|  | 1.37E-05 | 3.232625 | P02788 | P02788 | TRFL_HUMAN | LTF |
|  | 0.006156 | 3.017692 | P09603 | P09603 | CSF1_HUMAN | CSF1 |
|  | 1.7E-05 | 2.902442 | P02768 | P02768 | ALBU_HUMAN | ALB |
|  | 5.05E-05 | 2.803819 | O00204 | O00204 | ST2B1_HUMAN | SULT2B1 |
|  | 9.22E-07 | 2.693656 | Q8NDH2 | Q8NDH2 | CC168_HUMAN | CCDC168 |
|  | 0.000597 | 2.680381 | P01023 | P01023 | A2MG_HUMAN | A2M |
|  | 0.00069 | 2.61785 | P28799 | P28799 | GRN_HUMAN | GRN |
|  | 0.004817 | 2.21807 | Q14118 | Q14118 | DAG1_HUMAN | DAG1 |
|  | 0.005981 | 2.191399 | P19823 | P19823 | ITIH2_HUMAN | ITIH2 |
|  | 0.015371 | 2.174271 | P31431 | P31431 | SDC4_HUMAN | SDC4 |
|  | 0.002233 | 2.165546 | P08253 | P08253 | MMP2_HUMAN | MMP2 |
|  | 0.00451 | 2.072349 | P53634 | P53634 | CATC_HUMAN | CTSC |
|  | 7.05E-05 | 2.046673 | P01024 | P01024 | CO3_HUMAN | C3 |
|  | 0.003468 | 1.97608 | P69905 | P69905 | HBA_HUMAN | HBA1 |
|  | 0.001367 | 1.922025 | Q13867 | Q13867 | BLMH_HUMAN | BLMH |
|  | 0.001161 | 1.899802 | P10909 | P10909 | CLUS_HUMAN | CLU |
|  | 0.00289 | 1.89439 | Q12805 | Q12805 | FBLN3_HUMAN | EFEMP1 |
|  | 0.035299 | 1.865514 | Q16270 | Q16270 | IBP7_HUMAN | IGFBP7 |
|  | 0.002849 | 1.841954 | Q08380 | Q08380 | LG3BP_HUMAN | LGALS3BP |
|  | 0.01922 | 1.797431 | P07686 | P07686 | HEXB_HUMAN | HEXB |
|  | 0.001125 | 1.779356 | Q9H3G5 | Q9H3G5 | CPVL_HUMAN | CPVL |
|  | 0.005055 | 1.774494 | O94985 | O94985 | CSTN1_HUMAN | CLSTN1 |
|  | 0.046017 | 1.756269 | Q9BYK8 | Q9BYK8 | HELZ2_HUMAN | HELZ2 |
|  | 0.000133 | 1.639307 | P03973 | P03973 | SLPI_HUMAN | SLPI |
|  | 0.003612 | 1.533111 | P18827 | P18827 | SDC1_HUMAN | SDC1 |
|  | 0.02495 | 1.496917 | P09486 | P09486 | SPRC_HUMAN | SPARC |
|  | 0.00829 | 1.46982 | P01008 | P01008 | ANT3_HUMAN | SERPINC1 |
|  | 0.027991 | 1.465201 | Q9P0L0 | Q9P0L0 | VAPA_HUMAN | VAPA |
|  | 0.000346 | 1.430066 | P07858 | P07858 | CATB_HUMAN | CTSB |
|  | 0.001632 | 1.377429 | P23142 | P23142 | FBLN1_HUMAN | FBLN1 |
|  | 0.02704 | 1.370041 | P02647 | P02647 | APOA1_HUMAN | APOA1 |
|  | 0.009692 | 1.356033 | P13866;Q9NY91 | P13866;Q9NY91 | SC5A1_HUMAN;SC5A4_HUMAN | SLC5A1;SLC5A4 |
|  | 0.010077 | 1.351347 | P04080 | P04080 | CYTB_HUMAN | CSTB |
|  | 0.008832 | 1.289966 | P08572 | P08572 | CO4A2_HUMAN | COL4A2 |
|  | 0.00147 | 1.279342 | P07339 | P07339 | CATD_HUMAN | CTSD |
|  | 0.045518 | 1.277483 | P09211 | P09211 | GSTP1_HUMAN | GSTP1 |
|  | 0.002094 | 1.27229 | Q92820 | Q92820 | GGH_HUMAN | GGH |
|  | 0.038575 | 1.22875 | P15586 | P15586 | GNS_HUMAN | GNS |
|  | 0.044146 | 1.192057 | Q9UBR2 | Q9UBR2 | CATZ_HUMAN | CTSZ |
|  | 0.000961 | 1.185371 | P07996 | P07996 | TSP1_HUMAN | THBS1 |
|  | 0.020264 | 1.163507 | P16035 | P16035 | TIMP2_HUMAN | TIMP2 |
|  | 0.004636 | 1.156917 | Q86WI1 | Q86WI1 | PKHL1_HUMAN | PKHD1L1 |
|  | 0.018598 | 1.092532 | P62736;P63267;P68032 | P62736;P68032;P63267;P68133 | ACTA_HUMAN;ACTC_HUMAN;ACTH_HUMAN | ACTA2;ACTC1;ACTG2 |
|  | 0.002584 | 1.084664 | P02656 | P02656 | APOC3_HUMAN | APOC3 |
|  | 0.003852 | 1.058437 | P01033 | P01033 | TIMP1_HUMAN | TIMP1 |
|  | 0.043403 | 1.058249 | Q01469 | Q01469;A8MUU1 | FABP5_HUMAN | FABP5 |
|  | 0.004275 | 1.057106 | P26368 | P26368 | U2AF2_HUMAN | U2AF2 |
|  | 0.04181 | 0.98556 | Q9NY65 | Q71U36;Q9BQE3;P0DPH7;P0DPH8;Q6PEY2;Q9NY65 | TBA8_HUMAN | TUBA8 |
|  | 0.000132 | 0.982188 | P07602 | P07602 | SAP_HUMAN | PSAP |
|  | 0.004596 | 0.919458 | P02751 | P02751 | FINC_HUMAN | FN1 |
|  | 0.002723 | 0.90142 | P18065 | P18065 | IBP2_HUMAN | IGFBP2 |
|  | 0.000129 | 0.892238 | Q15582 | Q15582 | BGH3_HUMAN | TGFBI |
|  | 0.039907 | 0.768384 | P52209 | P52209 | 6PGD_HUMAN | PGD |
|  | 0.020494 | 0.763759 | P07093 | P07093 | GDN_HUMAN | SERPINE2 |
|  | 0.005373 | 0.744325 | P12109 | P12109 | CO6A1_HUMAN | COL6A1 |
|  | 0.003226 | 0.735006 | O00391 | O00391 | QSOX1_HUMAN | QSOX1 |
|  | 0.001878 | 0.733129 | P16070 | P16070 | CD44_HUMAN | CD44 |
|  | 0.040218 | 0.726879 | P24534 | P24534 | EF1B_HUMAN | EEF1B2 |
|  | 0.050022 | 0.68263 | P01034 | P01034 | CYTC_HUMAN | CST3 |
|  | 0.000128 | 0.679396 | P00558 | P00558 | PGK1_HUMAN | PGK1 |
|  | 0.049729 | 0.597738 | Q9HC38 | Q9HC38 | GLOD4_HUMAN | GLOD4 |
|  | 0.030064 | 0.580831 | P14174 | P14174 | MIF_HUMAN | MIF |
|  | 0.012705 | 0.559141 | Q16555 | Q14194;Q16555 | DPYL2_HUMAN | DPYSL2 |
|  | 0.039736 | 0.500501 | P62318 | P62318 | SMD3_HUMAN | SNRPD3 |
|  | 0.006341 | 0.491683 | P26038 | P15311;P26038;P35241 | MOES_HUMAN | MSN |
|  | 0.044331 | 0.438933 | P04439 | P04439;P01889;P13747;P17693;P01893 | HLAA_HUMAN | HLA-A |
|  | 0.011802 | 0.416294 | P15531 | O60361;P15531;P22392 | NDKA_HUMAN | NME1 |
|  | 0.003827 | 0.4057 | P48643 | P48643 | TCPE_HUMAN | CCT5 |
|  | 0.018604 | 0.383242 | P0DMV8;P0DMV9 | P0DMV8;P0DMV9 | HS71A_HUMAN;HS71B_HUMAN | HSPA1A;HSPA1B |
|  | 0.020107 | 0.3304 | P06733 | P06733 | ENOA_HUMAN | ENO1 |
|  | 0.031479 | 0.322957 | P18669 | P18669 | PGAM1_HUMAN | PGAM1 |
|  | 0.012492 | 0.183912 | Q06830 | Q06830 | PRDX1_HUMAN | PRDX1 |
|  | 0.025642 | -0.13382 | P29401 | P29401 | TKT_HUMAN | TKT |
|  | 0.015375 | -0.246 | P09429 | P09429 | HMGB1_HUMAN | HMGB1 |
|  | 0.024033 | -0.28687 | P29692 | P29692 | EF1D_HUMAN | EEF1D |
|  | 0.043026 | -0.29267 | P60981 | P60981 | DEST_HUMAN | DSTN |
|  | 0.006741 | -0.3053 | P19338 | P19338 | NUCL_HUMAN | NCL |
|  | 0.044689 | -0.37515 | P25786 | P25786 | PSA1_HUMAN | PSMA1 |
|  | 0.033479 | -0.37729 | P23396 | P23396 | RS3_HUMAN | RPS3 |
|  | 0.038843 | -0.43777 | P52565 | P52565 | GDIR1_HUMAN | ARHGDIA |
|  | 0.00714 | -0.44199 | P68104;Q5VTE0 | P68104;Q5VTE0 | EF1A1_HUMAN;EF1A3_HUMAN | EEF1A1;EEF1A1P5 |
|  | 0.002686 | -0.44536 | Q01105 | P0DME0;Q01105 | SET_HUMAN | SET |
|  | 0.041054 | -0.44564 | B2RXH8;B7ZW38;O60812;P07910;P0DMR1 | O60812;B2RXH8;B7ZW38;P0DMR1;P07910 | HNRC1_HUMAN;HNRC2_HUMAN;HNRC3_HUMAN;HNRC4_HUMAN;HNRPC_HUMAN | HNRNPC;HNRNPCL1;HNRNPCL2;HNRNPCL3;HNRNPCL4 |
|  | 0.009213 | -0.44681 | P02545 | P02545 | LMNA_HUMAN | LMNA |
|  | 0.035315 | -0.4606 | P05387 | P05387 | RLA2_HUMAN | RPLP2 |
|  | 0.029345 | -0.55422 | Q14554 | Q14554 | PDIA5_HUMAN | PDIA5 |
|  | 0.013564 | -0.59721 | P23284 | P23284 | PPIB_HUMAN | PPIB |
|  | 0.000556 | -0.62665 | Q16881 | Q16881 | TRXR1_HUMAN | TXNRD1 |
|  | 0.007339 | -0.63334 | Q92688 | Q92688 | AN32B_HUMAN | ANP32B |
|  | 0.009738 | -0.65304 | Q9UQ80 | Q9UQ80 | PA2G4_HUMAN | PA2G4 |
|  | 0.001404 | -0.65649 | P08670 | P08670 | VIME_HUMAN | VIM |
|  | 0.044558 | -0.76677 | Q9UK76 | Q9UK76 | JUPI1_HUMAN | JPT1 |
|  | 0.027771 | -0.77238 | P16402 | P16402 | H13_HUMAN | H1-3 |
|  | 0.021079 | -0.81699 | P61978 | P61978 | HNRPK_HUMAN | HNRNPK |
|  | 0.001401 | -0.84413 | P49411 | P49411 | EFTU_HUMAN | TUFM |
|  | 0.020698 | -0.84637 | P61604 | P61604 | CH10_HUMAN | HSPE1 |
|  | 0.01245 | -0.8675 | A0A2R8Y619;O60814;P06899;P23527;P33778;P57053;P58876;P62807;Q16778;Q5QNW6;Q8N257;Q93079;Q96A08;Q99877;Q99879;Q99880 | Q96A08;P33778;P62807;P58876;Q93079;P06899;O60814;Q99880;Q99879;Q99877;P23527;Q16778;Q5QNW6;Q8N257;A0A2R8Y619;P57053 | H2B1A_HUMAN;H2B1B_HUMAN;H2B1C_HUMAN;H2B1D_HUMAN;H2B1H_HUMAN;H2B1J_HUMAN;H2B1K_HUMAN;H2B1L_HUMAN;H2B1M_HUMAN;H2B1N_HUMAN;H2B1O_HUMAN;H2B2E_HUMAN;H2B2F_HUMAN;H2B3B_HUMAN;H2BE1_HUMAN;H2BFS_HUMAN | H2BC1;H2BC11;H2BC12;H2BC13;H2BC14;H2BC15;H2BC17;H2BC18;H2BC21;H2BC3;H2BC4;H2BC5;H2BC9;H2BE1;H2BS1;H2BU1 |
|  | 0.009797 | -0.8684 | Q9UL46 | Q9UL46 | PSME2_HUMAN | PSME2 |
|  | 0.000584 | -0.88887 | Q02790 | Q02790 | FKBP4_HUMAN | FKBP4 |
|  | 0.02925 | -0.9131 | P55060 | P55060 | XPO2_HUMAN | CSE1L |
|  | 0.006802 | -0.95189 | P40926 | P40926 | MDHM_HUMAN | MDH2 |
|  | 0.001647 | -0.97451 | Q14103 | Q14103 | HNRPD_HUMAN | HNRNPD |
|  | 0.024 | -1.01742 | P58546 | P58546 | MTPN_HUMAN | MTPN |
|  | 0.016411 | -1.12879 | Q12904 | Q12904 | AIMP1_HUMAN | AIMP1 |
|  | 0.012056 | -1.18207 | P61088;Q5JXB2 | P61088;Q5JXB2 | UBE2N_HUMAN;UE2NL_HUMAN | UBE2N;UBE2NL |
|  | 0.011639 | -1.2111 | P30101 | P30101 | PDIA3_HUMAN | PDIA3 |
|  | 0.012162 | -1.22936 | E9PAV3;Q13765 | E9PAV3;Q13765 | NACAM_HUMAN;NACA_HUMAN | NACA |
|  | 0.022935 | -1.23283 | P60903 | P60903 | S10AA_HUMAN | S100A10 |
|  | 0.00628 | -1.23766 | P13645 | P13645 | K1C10_HUMAN | KRT10 |
|  | 0.023433 | -1.2383 | Q96RY7 | Q96RY7 | IF140_HUMAN | IFT140 |
|  | 0.007996 | -1.33271 | Q96AE4 | Q96AE4 | FUBP1_HUMAN | FUBP1 |
|  | 0.019712 | -1.33483 | Q9NQC3 | Q9NQC3 | RTN4_HUMAN | RTN4 |
|  | 0.000161 | -1.36639 | P11021 | P11021 | BIP_HUMAN | HSPA5 |
|  | 0.036839 | -1.43472 | P16401 | P16401 | H15_HUMAN | H1-5 |
|  | 0.014506 | -1.48151 | P55884 | P55884 | EIF3B_HUMAN | EIF3B |
|  | 0.024578 | -1.51858 | P62263 | P62263 | RS14_HUMAN | RPS14 |
|  | 0.034933 | -1.6106 | Q9UHD8 | Q9UHD8 | SEPT9_HUMAN | SEPTIN9 |
|  | 0.013914 | -1.63705 | P14625 | P14625 | ENPL_HUMAN | HSP90B1 |
|  | 0.008307 | -1.74359 | Q09666 | Q09666 | AHNK_HUMAN | AHNAK |
|  | 0.01023 | -2.25254 | Q15084 | Q15084 | PDIA6_HUMAN | PDIA6 |
|  | 0.016424 | -2.51727 | Q8TEW8 | Q8TEW8 | PAR3L_HUMAN | PARD3B |

**Supplementary Table 3:** Proteomics data providing the complete list of proteins uniquely detected or enriched in p53-amyloid secretome, including their quantitative abundance profiles and associated annotations.

| **S.No.** | **P value** | **log2(fold_change)** | **Protein.Group** | **Protein.Ids** | **Protein.Names** | **Genes** |
| --- | --- | --- | --- | --- | --- | --- |
|  | 1.32397E-07 | 3.003377 | Q8NDH2 | Q8NDH2 | CC168_HUMAN | CCDC168 |
|  | 1.88079E-05 | 2.864616 | P02788 | P02788 | TRFL_HUMAN | LTF |
|  | 5.00375E-05 | 1.866414 | P01024 | P01024 | CO3_HUMAN | C3 |
|  | 5.43236E-05 | 2.993109 | P02768 | P02768 | ALBU_HUMAN | ALB |
|  | 6.14662E-05 | 3.045962 | O00204 | O00204 | ST2B1_HUMAN | SULT2B1 |
|  | 0.000307753 | 0.939782 | P02751 | P02751 | FINC_HUMAN | FN1 |
|  | 0.000366796 | 2.696681 | P01023 | P01023 | A2MG_HUMAN | A2M |
|  | 0.000369921 | -0.42015 | P19338 | P19338 | NUCL_HUMAN | NCL |
|  | 0.000463538 | 1.301044 | P07996 | P07996 | TSP1_HUMAN | THBS1 |
|  | 0.000547594 | 1.232521 | P10619 | P10619 | PPGB_HUMAN | CTSA |
|  | 0.000645394 | 0.650305 | Q15582 | Q15582 | BGH3_HUMAN | TGFBI |
|  | 0.000915261 | -1.11709 | Q13442 | Q13442 | HAP28_HUMAN | PDAP1 |
|  | 0.001050253 | 1.0711 | P07602 | P07602 | SAP_HUMAN | PSAP |
|  | 0.001280613 | 1.105654 | P01033 | P01033 | TIMP1_HUMAN | TIMP1 |
|  | 0.001353404 | 1.498824 | P03973 | P03973 | SLPI_HUMAN | SLPI |
|  | 0.001422335 | -0.85039 | P08670 | P08670 | VIME_HUMAN | VIM |
|  | 0.001681091 | 1.424283 | P02656 | P02656 | APOC3_HUMAN | APOC3 |
|  | 0.002045946 | -0.88618 | O60361 | O60361 | NDK8_HUMAN | NME2P1 |
|  | 0.002169842 | 1.029123 | P07339 | P07339 | CATD_HUMAN | CTSD |
|  | 0.002655889 | 1.523699 | Q12805 | Q12805 | FBLN3_HUMAN | EFEMP1 |
|  | 0.002707767 | 2.251634 | Q14118 | Q14118 | DAG1_HUMAN | DAG1 |
|  | 0.003289444 | 1.597567 | P10909 | P10909 | CLUS_HUMAN | CLU |
|  | 0.003663234 | 1.037527 | P07858 | P07858 | CATB_HUMAN | CTSB |
|  | 0.004105261 | 0.651095 | P12109 | P12109 | CO6A1_HUMAN | COL6A1 |
|  | 0.004533034 | -0.50996 | P29692 | P29692 | EF1D_HUMAN | EEF1D |
|  | 0.004759472 | -1.7125 | Q15084 | Q15084 | PDIA6_HUMAN | PDIA6 |
|  | 0.005046052 | 1.174474 | P23142 | P23142 | FBLN1_HUMAN | FBLN1 |
|  | 0.005143281 | -0.61057 | P02545 | P02545 | LMNA_HUMAN | LMNA |
|  | 0.006360893 | -0.86738 | P61604 | P61604 | CH10_HUMAN | HSPE1 |
|  | 0.007153152 | -0.33053 | P68104;Q5VTE0 | P68104;Q5VTE0 | EF1A1_HUMAN;EF1A3_HUMAN | EEF1A1;EEF1A1P5 |
|  | 0.008333879 | 2.036341 | P19823 | P19823 | ITIH2_HUMAN | ITIH2 |
|  | 0.008867091 | -0.94911 | P30101 | P30101 | PDIA3_HUMAN | PDIA3 |
|  | 0.009247248 | 1.495403 | P18827 | P18827 | SDC1_HUMAN | SDC1 |
|  | 0.009347972 | 1.243794 | Q9H3G5 | Q9H3G5 | CPVL_HUMAN | CPVL |
|  | 0.009571535 | 1.425015 | P28799 | P28799 | GRN_HUMAN | GRN |
|  | 0.010450178 | 0.723011 | P18065 | P18065 | IBP2_HUMAN | IGFBP2 |
|  | 0.011537186 | 1.095448 | Q9HC38 | Q9HC38 | GLOD4_HUMAN | GLOD4 |
|  | 0.011885177 | -0.46591 | Q14554 | Q14554 | PDIA5_HUMAN | PDIA5 |
|  | 0.012369073 | 1.283821 | Q08380 | Q08380 | LG3BP_HUMAN | LGALS3BP |
|  | 0.012415245 | 0.134314 | Q06830 | Q06830 | PRDX1_HUMAN | PRDX1 |
|  | 0.012873921 | 2.889652 | Q9C0B2 | Q9C0B2 | CFA74_HUMAN | CFAP74 |
|  | 0.013762356 | 2.958909 | P0C0L4;P0C0L5 | P0C0L4;P0C0L5 | CO4A_HUMAN;CO4B_HUMAN | C4A;C4B |
|  | 0.014180383 | -0.70225 | Q96AE4 | Q96AE4 | FUBP1_HUMAN | FUBP1 |
|  | 0.01437815 | -0.90972 | P59998 | P59998 | ARPC4_HUMAN | ARPC4 |
|  | 0.014792426 | 2.726 | Q8N165 | Q8N165 | PDK1L_HUMAN | PDIK1L |
|  | 0.015156808 | -0.41357 | P09429 | P09429 | HMGB1_HUMAN | HMGB1 |
|  | 0.015327418 | 1.553301 | P53634 | P53634 | CATC_HUMAN | CTSC |
|  | 0.015577943 | 1.576934 | P02647 | P02647 | APOA1_HUMAN | APOA1 |
|  | 0.01773092 | -0.95037 | P14625 | P14625 | ENPL_HUMAN | HSP90B1 |
|  | 0.018417124 | -1.82382 | P16401 | P16401 | H15_HUMAN | H1-5 |
|  | 0.019856887 | 0.604771 | Q9NTK5 | Q9NTK5 | OLA1_HUMAN | OLA1 |
|  | 0.020158057 | 1.214125 | P01008 | P01008 | ANT3_HUMAN | SERPINC1 |
|  | 0.020646756 | 2.432141 | P09603 | P09603 | CSF1_HUMAN | CSF1 |
|  | 0.021682069 | -0.65699 | P22626 | P22626 | ROA2_HUMAN | HNRNPA2B1 |
|  | 0.024885584 | 1.303279 | O94985 | O94985 | CSTN1_HUMAN | CLSTN1 |
|  | 0.025888548 | 0.581768 | O00391 | O00391 | QSOX1_HUMAN | QSOX1 |
|  | 0.027772423 | -1.17117 | P11021 | P11021 | BIP_HUMAN | HSPA5 |
|  | 0.028110719 | 0.440709 | P08195 | P08195 | 4F2_HUMAN | SLC3A2 |
|  | 0.03006426 | -0.952 | P60903 | P60903 | S10AA_HUMAN | S100A10 |
|  | 0.030251639 | 0.197939 | P60709;P63261 | P60709;P63261 | ACTB_HUMAN;ACTG_HUMAN | ACTB;ACTG1 |
|  | 0.030650676 | -0.43045 | Q01105 | P0DME0;Q01105 | SET_HUMAN | SET |
|  | 0.030832369 | 1.323665 | P08253 | P08253 | MMP2_HUMAN | MMP2 |
|  | 0.031437652 | -0.28376 | P31946 | P31946 | 1433B_HUMAN | YWHAB |
|  | 0.032813138 | 1.721365 | P61916 | P61916 | NPC2_HUMAN | NPC2 |
|  | 0.034706925 | -0.43879 | P55884 | P55884 | EIF3B_HUMAN | EIF3B |
|  | 0.035016657 | 0.321414 | P26447 | P26447 | S10A4_HUMAN | S100A4 |
|  | 0.035147626 | -0.698 | P05387 | P05387 | RLA2_HUMAN | RPLP2 |
|  | 0.035309915 | -0.27045 | P16402 | P16402 | H13_HUMAN | H1-3 |
|  | 0.035748435 | -0.97966 | P49411 | P49411 | EFTU_HUMAN | TUFM |
|  | 0.036869702 | 0.436203 | P68371 | P68371 | TBB4B_HUMAN | TUBB4B |
|  | 0.037514002 | -0.40734 | P06753 | P06753 | TPM3_HUMAN | TPM3 |
|  | 0.037741407 | -0.673 | P20700 | P20700 | LMNB1_HUMAN | LMNB1 |
|  | 0.039827871 | -0.51841 | P53396 | P53396 | ACLY_HUMAN | ACLY |
|  | 0.040208885 | -0.28903 | P15531 | O60361;P15531;P22392 | NDKA_HUMAN | NME1 |
|  | 0.043589306 | -0.69368 | Q9UHD8 | Q9UHD8 | SEPT9_HUMAN | SEPTIN9 |
|  | 0.047484467 | -0.67275 | Q9UK76 | Q9UK76 | JUPI1_HUMAN | JPT1 |
|  | 0.051463787 | -0.25895 | P07737 | P07737 | PROF1_HUMAN | PFN1 |
|  | 0.052697658 | 1.221329 | Q9NY65 | Q71U36;Q9BQE3;P0DPH7;P0DPH8;Q6PEY2;Q9NY65 | TBA8_HUMAN | TUBA8 |
|  | 0.054995932 | -0.66757 | P61978 | P61978 | HNRPK_HUMAN | HNRNPK |
|  | 0.055479381 | -1.1178 | Q09666 | Q09666 | AHNK_HUMAN | AHNAK |
|  | 0.056408871 | -0.59146 | P13645 | P13645 | K1C10_HUMAN | KRT10 |
|  | 0.057830673 | 0.214355 | P00558 | P00558 | PGK1_HUMAN | PGK1 |
|  | 0.060221826 | 0.650666 | P01034 | P01034 | CYTC_HUMAN | CST3 |
|  | 0.060295991 | 0.329104 | P60900 | P60900 | PSA6_HUMAN | PSMA6 |
|  | 0.060624812 | -0.39511 | Q92688 | Q92688 | AN32B_HUMAN | ANP32B |
|  | 0.062377152 | -0.42604 | P23284 | P23284 | PPIB_HUMAN | PPIB |
|  | 0.06261978 | 1.638341 | P31431 | P31431 | SDC4_HUMAN | SDC4 |
|  | 0.063427558 | 1.277353 | P07686 | P07686 | HEXB_HUMAN | HEXB |
|  | 0.064550433 | -1.1232 | P35908 | P35908 | K22E_HUMAN | KRT2 |
|  | 0.06538626 | 0.507998 | Q15366 | Q15366;P57721 | PCBP2_HUMAN | PCBP2 |
|  | 0.066815759 | 0.462125 | P28072 | P28072 | PSB6_HUMAN | PSMB6 |
|  | 0.068069128 | -0.76147 | P54819 | P54819 | KAD2_HUMAN | AK2 |
|  | 0.071832612 | 0.971512 | Q9UBR2 | Q9UBR2 | CATZ_HUMAN | CTSZ |
|  | 0.077436398 | 0.629193 | P07093 | P07093 | GDN_HUMAN | SERPINE2 |
|  | 0.077673844 | 1.015773 | P06737 | P06737 | PYGL_HUMAN | PYGL |
|  | 0.079971466 | -0.90398 | P35579 | P35579 | MYH9_HUMAN | MYH9 |
|  | 0.080862137 | 0.623289 | Q92820 | Q92820 | GGH_HUMAN | GGH |
|  | 0.085765333 | 0.844072 | P00734 | P00734 | THRB_HUMAN | F2 |
|  | 0.087671216 | -0.86677 | Q12841 | Q12841 | FSTL1_HUMAN | FSTL1 |
|  | 0.097631278 | -1.45772 | P58546 | P58546 | MTPN_HUMAN | MTPN |
|  | 0.098619426 | 0.401744 | P42330 | Q04828;P52895;P42330 | AK1C3_HUMAN | AKR1C3 |
|  | 0.101487264 | 0.556981 | P48643 | P48643 | TCPE_HUMAN | CCT5 |
|  | 0.101623411 | 0.156556 | P63104 | P63104 | 1433Z_HUMAN | YWHAZ |
|  | 0.10286721 | 0.86235 | P09486 | P09486 | SPRC_HUMAN | SPARC |
|  | 0.107787117 | 0.433731 | P15121 | P15121 | ALDR_HUMAN | AKR1B1 |
|  | 0.109838554 | 0.438094 | P49327 | P49327 | FAS_HUMAN | FASN |
|  | 0.112215743 | -0.27958 | P52565 | P52565 | GDIR1_HUMAN | ARHGDIA |
|  | 0.112396551 | -1.133 | Q12904 | Q12904 | AIMP1_HUMAN | AIMP1 |
|  | 0.113624359 | -0.62364 | P0CG47;P0CG48;P62979;P62987 | P62987;P62979;P0CG47;P0CG48 | RL40_HUMAN;RS27A_HUMAN;UBB_HUMAN;UBC_HUMAN | RPS27A;UBA52;UBB;UBC |
|  | 0.11446505 | 0.595835 | P24534 | P24534 | EF1B_HUMAN | EEF1B2 |
|  | 0.1159039 | -0.91596 | Q15631 | Q15631 | TSN_HUMAN | TSN |
|  | 0.12217116 | -0.2085 | P18206 | P18206 | VINC_HUMAN | VCL |
|  | 0.122446429 | -0.82793 | P40926 | P40926 | MDHM_HUMAN | MDH2 |
|  | 0.125030648 | 0.438185 | P02786 | P02786 | TFR1_HUMAN | TFRC |
|  | 0.130128866 | -0.33712 | P60981 | P60981 | DEST_HUMAN | DSTN |
|  | 0.130414953 | -0.82748 | O75347 | O75347 | TBCA_HUMAN | TBCA |
|  | 0.132756932 | -0.33656 | iRT_peptide11 | iRT_peptide11 | |  |
|  | 0.135803513 | 0.606603 | Q6YHK3 | Q6YHK3 | CD109_HUMAN | CD109 |
|  | 0.137691055 | -0.10831 | P00338 | P00338 | LDHA_HUMAN | LDHA |
|  | 0.140618607 | -1.44361 | Q9H4A4 | Q9H4A4 | AMPB_HUMAN | RNPEP |
|  | 0.142772142 | 0.463085 | P33316 | P33316 | DUT_HUMAN | DUT |
|  | 0.142965638 | -0.49589 | O15347 | O15347 | HMGB3_HUMAN | HMGB3 |
|  | 0.153993947 | 0.492292 | P23528 | P23528;Q9Y281 | COF1_HUMAN | CFL1 |
|  | 0.15422254 | -0.59974 | Q01518 | Q01518 | CAP1_HUMAN | CAP1 |
|  | 0.154697699 | 0.17183 | P23526 | P23526 | SAHH_HUMAN | AHCY |
|  | 0.156552897 | -0.05179 | P08238 | Q58FF8;Q14568;P07900;P08238 | HS90B_HUMAN | HSP90AB1 |
|  | 0.157266543 | -0.73298 | Q9NQC3 | Q9NQC3 | RTN4_HUMAN | RTN4 |
|  | 0.157684916 | -0.71518 | Q14103 | Q14103 | HNRPD_HUMAN | HNRNPD |
|  | 0.158080861 | 0.936865 | P16035 | P16035 | TIMP2_HUMAN | TIMP2 |
|  | 0.158158318 | -0.40005 | Q15181 | Q15181 | IPYR_HUMAN | PPA1 |
|  | 0.159627079 | -0.5586 | P09382 | P09382 | LEG1_HUMAN | LGALS1 |
|  | 0.159682008 | -0.51371 | P25398 | P25398 | RS12_HUMAN | RPS12 |
|  | 0.160317771 | -0.10551 | P25786 | P25786 | PSA1_HUMAN | PSMA1 |
|  | 0.1610427 | 0.474331 | P08572 | P08572 | CO4A2_HUMAN | COL4A2 |
|  | 0.161762801 | 0.505834 | B2RXH8;B7ZW38;O60812;P07910;P0DMR1 | O60812;B2RXH8;B7ZW38;P0DMR1;P07910 | HNRC1_HUMAN;HNRC2_HUMAN;HNRC3_HUMAN;HNRC4_HUMAN;HNRPC_HUMAN | HNRNPC;HNRNPCL1;HNRNPCL2;HNRNPCL3;HNRNPCL4 |
|  | 0.163707212 | -0.2009 | O14818 | O14818 | PSA7_HUMAN | PSMA7 |
|  | 0.167780968 | 0.625774 | P20962 | P20962 | PTMS_HUMAN | PTMS |
|  | 0.167864369 | 0.177282 | P09972 | P09972 | ALDOC_HUMAN | ALDOC |
|  | 0.168020063 | 0.207289 | P62826 | P62826 | RAN_HUMAN | RAN |
|  | 0.17115579 | -0.15372 | P23396 | P23396 | RS3_HUMAN | RPS3 |
|  | 0.174793678 | 1.435316 | P52272 | P52272 | HNRPM_HUMAN | HNRNPM |
|  | 0.18245574 | -0.52763 | iRT_peptide6 | iRT_peptide6 | |  |
|  | 0.185087845 | -1.01608 | Q07021 | Q07021 | C1QBP_HUMAN | C1QBP |
|  | 0.186413025 | -1.34135 | iRT_peptide8 | iRT_peptide8 | |  |
|  | 0.191595582 | 0.490532 | P52209 | P52209 | 6PGD_HUMAN | PGD |
|  | 0.195401052 | 1.135263 | Q16270 | Q16270 | IBP7_HUMAN | IGFBP7 |
|  | 0.195794738 | -0.08265 | P62258 | P62258 | 1433E_HUMAN | YWHAE |
|  | 0.196017605 | -0.13118 | P07195 | Q6ZMR3;P00338;P07195;P07864 | LDHB_HUMAN | LDHB |
|  | 0.200778964 | -0.55135 | Q16658 | Q16658 | FSCN1_HUMAN | FSCN1 |
|  | 0.206353903 | -0.70326 | P10809 | P10809 | CH60_HUMAN | HSPD1 |
|  | 0.207022552 | -0.25164 | P26641 | P26641 | EF1G_HUMAN | EEF1G |
|  | 0.210097292 | 0.137654 | P16070 | P16070 | CD44_HUMAN | CD44 |
|  | 0.211047264 | -0.30524 | Q16881 | Q16881 | TRXR1_HUMAN | TXNRD1 |
|  | 0.212824789 | 0.388763 | P07355 | P07355 | ANXA2_HUMAN | ANXA2 |
|  | 0.225427663 | -0.85789 | P26639 | P26639 | SYTC_HUMAN | TARS1 |
|  | 0.234256451 | -1.00908 | P48507 | P48507 | GSH0_HUMAN | GCLM |
|  | 0.235949634 | 0.232989 | Q16531 | Q16531 | DDB1_HUMAN | DDB1 |
|  | 0.248493385 | -0.15609 | P55072 | P55072 | TERA_HUMAN | VCP |
|  | 0.249607694 | -0.32626 | P17987 | P17987 | TCPA_HUMAN | TCP1 |
|  | 0.250990756 | -0.33131 | Q86WI1 | Q86WI1 | PKHL1_HUMAN | PKHD1L1 |
|  | 0.251265588 | -1.39608 | Q9NUN7 | Q9NUN7 | ACER3_HUMAN | ACER3 |
|  | 0.253118773 | 0.531927 | P31153 | P31153 | METK2_HUMAN | MAT2A |
|  | 0.263224047 | 0.627757 | P25788 | P25788 | PSA3_HUMAN | PSMA3 |
|  | 0.26525928 | -0.14792 | iRT_peptide2 | iRT_peptide2 | |  |
|  | 0.267618719 | 0.525298 | Q9P0L0 | Q9P0L0 | VAPA_HUMAN | VAPA |
|  | 0.268936241 | 0.611072 | P69905 | P69905 | HBA_HUMAN | HBA1 |
|  | 0.272286134 | 0.135937 | P0DMV8;P0DMV9 | P0DMV8;P0DMV9 | HS71A_HUMAN;HS71B_HUMAN | HSPA1A;HSPA1B |
|  | 0.283703307 | 0.353393 | Q14847 | Q14847 | LASP1_HUMAN | LASP1 |
|  | 0.292757032 | 0.893401 | P11047 | P11047 | LAMC1_HUMAN | LAMC1 |
|  | 0.294308558 | -1.10569 | P56537 | P56537 | IF6_HUMAN | EIF6 |
|  | 0.294543949 | 0.62558 | P09211 | P09211 | GSTP1_HUMAN | GSTP1 |
|  | 0.296610659 | -0.34831 | P51858 | P51858 | HDGF_HUMAN | HDGF |
|  | 0.300558184 | -0.2328 | Q99497 | Q99497 | PARK7_HUMAN | PARK7 |
|  | 0.30376401 | -0.24647 | P78371 | P78371 | TCPB_HUMAN | CCT2 |
|  | 0.30767076 | -0.14445 | iRT_peptide1 | iRT_peptide1 | |  |
|  | 0.314959474 | -0.21826 | iRT_peptide9 | iRT_peptide9 | |  |
|  | 0.32149762 | -0.39391 | Q99436 | Q99436 | PSB7_HUMAN | PSMB7 |
|  | 0.325375923 | -0.95117 | P61769 | P61769 | B2MG_HUMAN | B2M |
|  | 0.327736818 | -1.25559 | Q12931 | Q12931 | TRAP1_HUMAN | TRAP1 |
|  | 0.331086023 | -0.10691 | iRT_peptide4 | iRT_peptide4 | |  |
|  | 0.332035905 | -0.53679 | P11586 | P11586 | C1TC_HUMAN | MTHFD1 |
|  | 0.332401388 | -0.17407 | P34932 | P34932 | HSP74_HUMAN | HSPA4 |
|  | 0.334026262 | -0.14279 | P16949 | P16949 | STMN1_HUMAN | STMN1 |
|  | 0.338756839 | -0.52101 | P11216 | P11216 | PYGB_HUMAN | PYGB |
|  | 0.342410967 | -0.59067 | Q00610 | Q00610 | CLH1_HUMAN | CLTC |
|  | 0.345963672 | -0.47643 | P26368 | P26368 | U2AF2_HUMAN | U2AF2 |
|  | 0.349094075 | 0.714957 | P05141 | P05141 | ADT2_HUMAN | SLC25A5 |
|  | 0.349632044 | 0.096968 | P06733 | P06733 | ENOA_HUMAN | ENO1 |
|  | 0.35283254 | 0.259682 | P07437 | P04350;P68371;P07437 | TBB5_HUMAN | TUBB |
|  | 0.359042421 | -1.49826 | Q9NQH7 | Q9NQH7 | XPP3_HUMAN | XPNPEP3 |
|  | 0.360862615 | -0.1473 | P11142 | P11021;P0DMV8;P0DMV9;P34931;P54652;P11142 | HSP7C_HUMAN | HSPA8 |
|  | 0.362416745 | 0.409718 | Q99873 | Q99873 | ANM1_HUMAN | PRMT1 |
|  | 0.365786839 | 0.228184 | P21333 | P21333 | FLNA_HUMAN | FLNA |
|  | 0.379408372 | -0.13944 | P12004 | P12004 | PCNA_HUMAN | PCNA |
|  | 0.38053316 | -0.11334 | iRT_peptide10 | iRT_peptide10 | |  |
|  | 0.383906812 | 0.289561 | P04908;P0C0S8;P20671;Q7L7L0;Q93077;Q96KK5;Q99878;Q9BTM1 | P04908;Q93077;P20671;Q96KK5;Q99878;P0C0S8;Q6FI13;Q16777;Q7L7L0;Q9BTM1 | H2A1B_HUMAN;H2A1C_HUMAN;H2A1D_HUMAN;H2A1H_HUMAN;H2A1J_HUMAN;H2A1_HUMAN;H2A3_HUMAN;H2AJ_HUMAN | H2AC11;H2AC12;H2AC14;H2AC4;H2AC6;H2AC7;H2AJ;H2AW |
|  | 0.390071262 | -0.1155 | P14618 | P14618 | KPYM_HUMAN | PKM |
|  | 0.39518522 | 0.129099 | P55786 | P55786 | PSA_HUMAN | NPEPPS |
|  | 0.39973782 | 0.229467 | P17174 | P17174 | AATC_HUMAN | GOT1 |
|  | 0.40035226 | -0.08204 | P29401 | P29401 | TKT_HUMAN | TKT |
|  | 0.402128106 | -0.31423 | P63279 | P63279 | UBC9_HUMAN | UBE2I |
|  | 0.40838293 | -0.08091 | P18669 | P18669 | PGAM1_HUMAN | PGAM1 |
|  | 0.416904035 | -0.78559 | P37802 | P37802 | TAGL2_HUMAN | TAGLN2 |
|  | 0.417239436 | -0.27202 | Q15365 | Q15365 | PCBP1_HUMAN | PCBP1 |
|  | 0.422370616 | 0.400389 | P05783;P08727 | P05783;P08727 | K1C18_HUMAN;K1C19_HUMAN | KRT18;KRT19 |
|  | 0.422455823 | 0.224886 | P04439 | P04439;P01889;P13747;P17693;P01893 | HLAA_HUMAN | HLA-A |
|  | 0.424289247 | 0.276875 | Q9BRA2 | Q9BRA2 | TXD17_HUMAN | TXNDC17 |
|  | 0.42785115 | -0.11768 | Q562R1 | Q562R1 | ACTBL_HUMAN | ACTBL2 |
|  | 0.435221192 | -0.78003 | P61204;P84077;P84085 | P84077;P61204;P84085 | ARF1_HUMAN;ARF3_HUMAN;ARF5_HUMAN | ARF1;ARF3;ARF5 |
|  | 0.437741511 | 0.189128 | Q13404 | Q13404 | UB2V1_HUMAN | UBE2V1 |
|  | 0.43953888 | -0.36028 | P35637;Q92804 | P35637;Q92804 | FUS_HUMAN;RBP56_HUMAN | FUS;TAF15 |
|  | 0.44059596 | 0.723162 | Q13867 | Q13867 | BLMH_HUMAN | BLMH |
|  | 0.450326626 | -0.35534 | Q96RY7 | Q96RY7 | IF140_HUMAN | IFT140 |
|  | 0.45691529 | -0.31491 | P13866;Q9NY91 | P13866;Q9NY91 | SC5A1_HUMAN;SC5A4_HUMAN | SLC5A1;SLC5A4 |
|  | 0.459913978 | 0.477594 | P15586 | P15586 | GNS_HUMAN | GNS |
|  | 0.460914183 | -0.18353 | P05388;Q8NHW5 | Q8NHW5;P05388 | RLA0L_HUMAN;RLA0_HUMAN | RPLP0;RPLP0P6 |
|  | 0.46127593 | 0.11701 | P13489 | P13489 | RINI_HUMAN | RNH1 |
|  | 0.462342158 | 0.098207 | P62937 | P62937 | PPIA_HUMAN | PPIA |
|  | 0.465100922 | -0.27955 | P49368 | P49368 | TCPG_HUMAN | CCT3 |
|  | 0.467703609 | 0.562317 | O60888 | O60888 | CUTA_HUMAN | CUTA |
|  | 0.473075633 | -0.10834 | P50502;Q8IZP2 | P50502;Q8NFI4;Q8IZP2 | F10A1_HUMAN;ST134_HUMAN | ST13;ST13P4 |
|  | 0.474508657 | -0.13243 | P07900 | P07900 | HS90A_HUMAN | HSP90AA1 |
|  | 0.477149673 | -0.22878 | O00299 | O00299 | CLIC1_HUMAN | CLIC1 |
|  | 0.477761794 | -0.47809 | P40227 | P40227 | TCPZ_HUMAN | CCT6A |
|  | 0.486721046 | -0.25536 | Q06323 | Q06323 | PSME1_HUMAN | PSME1 |
|  | 0.496506764 | 0.747183 | Q05639 | Q05639 | EF1A2_HUMAN | EEF1A2 |
|  | 0.509967742 | 0.410867 | Q01469 | Q01469;A8MUU1 | FABP5_HUMAN | FABP5 |
|  | 0.510520591 | -0.26331 | Q9UL46 | Q9UL46 | PSME2_HUMAN | PSME2 |
|  | 0.515620622 | -0.10787 | P60174 | P60174 | TPIS_HUMAN | TPI1 |
|  | 0.520417244 | -0.27322 | P10599 | P10599 | THIO_HUMAN | TXN |
|  | 0.52237371 | -0.31471 | Q13451 | Q13451 | FKBP5_HUMAN | FKBP5 |
|  | 0.527362448 | 0.32697 | Q6GMV3 | Q6GMV3 | PTRD1_HUMAN | PTRHD1 |
|  | 0.527725418 | -0.13522 | Q02790 | Q02790 | FKBP4_HUMAN | FKBP4 |
|  | 0.53736492 | -0.27584 | P63241;Q6IS14;Q9GZV4 | P63241;Q9GZV4;Q6IS14 | IF5A1_HUMAN;IF5A2_HUMAN;IF5AL_HUMAN | EIF5A;EIF5A2;EIF5AL1 |
|  | 0.555126855 | -0.19495 | Q9Y5S9 | Q9Y5S9 | RBM8A_HUMAN | RBM8A |
|  | 0.556477888 | 0.691894 | P15291 | P15291 | B4GT1_HUMAN | B4GALT1 |
|  | 0.558696103 | -0.21979 | P62736;P63267;P68032 | P62736;P68032;P63267;P68133 | ACTA_HUMAN;ACTC_HUMAN;ACTH_HUMAN | ACTA2;ACTC1;ACTG2 |
|  | 0.566829973 | 0.406544 | Q9BYK8 | Q9BYK8 | HELZ2_HUMAN | HELZ2 |
|  | 0.568047363 | -0.25044 | iRT_peptide7 | iRT_peptide7 | |  |
|  | 0.570686638 | 0.196849 | E9PAV3;Q13765 | E9PAV3;Q13765 | NACAM_HUMAN;NACA_HUMAN | NACA |
|  | 0.570957474 | 0.14571 | P0DP23;P0DP24;P0DP25 | P27482;P0DP23;P0DP24;P0DP25 | CALM1_HUMAN;CALM2_HUMAN;CALM3_HUMAN | CALM1;CALM2;CALM3 |
|  | 0.572240013 | -0.3257 | A0A1B0GUS4;P68036 | P68036;A0A1B0GUS4 | UB2L3_HUMAN;UB2L5_HUMAN | UBE2L3;UBE2L5 |
|  | 0.573041787 | 0.189356 | Q15149 | Q15149 | PLEC_HUMAN | PLEC |
|  | 0.573205152 | 0.387892 | P28066 | P28066 | PSA5_HUMAN | PSMA5 |
|  | 0.576482541 | 0.228124 | Q8TEW8 | Q8TEW8 | PAR3L_HUMAN | PARD3B |
|  | 0.57954235 | -0.16144 | P55060 | P55060 | XPO2_HUMAN | CSE1L |
|  | 0.582028343 | -0.41125 | Q96KP4 | Q96KP4 | CNDP2_HUMAN | CNDP2 |
|  | 0.583700705 | 0.124959 | P50990 | P50990 | TCPQ_HUMAN | CCT8 |
|  | 0.595805229 | 0.304451 | P14174 | P14174 | MIF_HUMAN | MIF |
|  | 0.600237165 | -0.27145 | P12081 | P12081 | HARS1_HUMAN | HARS1 |
|  | 0.613615538 | 0.271267 | P02774 | P02774 | VTDB_HUMAN | GC |
|  | 0.616636928 | -0.37821 | Q15843 | Q15843 | NEDD8_HUMAN | NEDD8 |
|  | 0.623844054 | -0.20117 | P62310 | P62310 | LSM3_HUMAN | LSM3 |
|  | 0.628635623 | 0.228869 | P62857 | P62857 | RS28_HUMAN | RPS28 |
|  | 0.630228353 | 0.503113 | P02795;P04732;P13640;P80297;Q8N339 | P04732;P13640;Q8N339;P80297;P02795 | MT1E_HUMAN;MT1G_HUMAN;MT1M_HUMAN;MT1X_HUMAN;MT2_HUMAN | MT1E;MT1G;MT1M;MT1X;MT2A |
|  | 0.632908462 | -0.19374 | P00390 | P00390 | GSHR_HUMAN | GSR |
|  | 0.635477896 | 0.278348 | O00764 | O00764 | PDXK_HUMAN | PDXK |
|  | 0.636606367 | 0.148455 | P63244 | P63244 | RACK1_HUMAN | RACK1 |
|  | 0.638192878 | 0.386372 | P55209 | P55209 | NP1L1_HUMAN | NAP1L1 |
|  | 0.642478748 | -0.36289 | Q9H299 | Q9H299 | SH3L3_HUMAN | SH3BGRL3 |
|  | 0.646985595 | -0.05927 | P40925 | P40925 | MDHC_HUMAN | MDH1 |
|  | 0.64918029 | -0.16451 | Q16555 | Q14194;Q16555 | DPYL2_HUMAN | DPYSL2 |
|  | 0.652861396 | 0.369471 | P13797 | P13797 | PLST_HUMAN | PLS3 |
|  | 0.653589705 | -0.50357 | P00966 | P00966 | ASSY_HUMAN | ASS1 |
|  | 0.657087019 | 0.215455 | P14324 | P14324 | FPPS_HUMAN | FDPS |
|  | 0.66020042 | -0.30134 | P25789 | P25789 | PSA4_HUMAN | PSMA4 |
|  | 0.662567446 | -0.0787 | P06744 | P06744 | G6PI_HUMAN | GPI |
|  | 0.672024811 | 0.07418 | Q9H0I9 | Q9H0I9 | TKTL2_HUMAN | TKTL2 |
|  | 0.672046123 | 0.205532 | P12956 | P12956 | XRCC6_HUMAN | XRCC6 |
|  | 0.681949715 | -0.1778 | Q04917 | Q04917 | 1433F_HUMAN | YWHAH |
|  | 0.700527504 | 0.023751 | P04075 | P04075 | ALDOA_HUMAN | ALDOA |
|  | 0.701309713 | 0.178446 | P78417 | P78417 | GSTO1_HUMAN | GSTO1 |
|  | 0.707353807 | 0.307119 | O75369 | O75369 | FLNB_HUMAN | FLNB |
|  | 0.712607858 | -0.25001 | P62263 | P62263 | RS14_HUMAN | RPS14 |
|  | 0.712640111 | -0.35728 | Q9Y4K0 | Q9Y4K0 | LOXL2_HUMAN | LOXL2 |
|  | 0.715275521 | -0.1983 | P20618 | P20618 | PSB1_HUMAN | PSMB1 |
|  | 0.718681814 | 0.234781 | P60660 | P60660 | MYL6_HUMAN | MYL6 |
|  | 0.719480936 | 0.246496 | O95716;P20336;P20337;P20338;P61006;P61018;P61026;P61106;P62820;Q15286;Q15771;Q6IQ22;Q86YS6;Q92928;Q92930;Q96AX2;Q96DA2;Q96E17;Q9H0U4 | P61026;Q6IQ22;P61106;P62820;Q9H0U4;Q92928;Q15771;Q15286;Q96AX2;P20336;P20337;Q96E17;O95716;Q86YS6;P20338;P61018;P61006;Q92930;Q96DA2 | RAB10_HUMAN;RAB12_HUMAN;RAB14_HUMAN;RAB1A_HUMAN;RAB1B_HUMAN;RAB1C_HUMAN;RAB30_HUMAN;RAB35_HUMAN;RAB37_HUMAN;RAB3A_HUMAN;RAB3B_HUMAN;RAB3C_HUMAN;RAB3D_HUMAN;RAB43_HUMAN;RAB4A_HUMAN;RAB4B_HUMAN;RAB8A_HUMAN;RAB8B_HUMAN;RB39B_HUMAN | RAB10;RAB12;RAB14;RAB1A;RAB1B;RAB1C;RAB30;RAB35;RAB37;RAB39B;RAB3A;RAB3B;RAB3C;RAB3D;RAB43;RAB4A;RAB4B;RAB8A;RAB8B |
|  | 0.730663771 | -0.11329 | P12814 | P12814;P35609 | ACTN1_HUMAN | ACTN1 |
|  | 0.732677461 | -0.12258 | P15559 | P15559 | NQO1_HUMAN | NQO1 |
|  | 0.738631404 | 0.042776 | P08865 | P08865 | RSSA_HUMAN | RPSA |
|  | 0.747459249 | -0.05124 | P26038 | P15311;P26038;P35241 | MOES_HUMAN | MSN |
|  | 0.747986824 | 0.124879 | P06703 | P06703 | S10A6_HUMAN | S100A6 |
|  | 0.752920166 | 0.130539 | P55327 | P55327 | TPD52_HUMAN | TPD52 |
|  | 0.762579552 | -0.06977 | P48741 | P17066;P48741 | HSP77_HUMAN | HSPA7 |
|  | 0.769263247 | -0.10272 | P04080 | P04080 | CYTB_HUMAN | CSTB |
|  | 0.784677199 | -0.06821 | P43490 | P43490 | NAMPT_HUMAN | NAMPT |
|  | 0.798872088 | 0.179405 | P15311 | P15311 | EZRI_HUMAN | EZR |
|  | 0.807943402 | -0.12554 | P27348 | P27348 | 1433T_HUMAN | YWHAQ |
|  | 0.814213023 | -0.08498 | P55854;P61956;Q6EEV6 | P61956;P55854;Q6EEV6 | SUMO2_HUMAN;SUMO3_HUMAN;SUMO4_HUMAN | SUMO2;SUMO3;SUMO4 |
|  | 0.81491343 | -0.10972 | O15511 | O15511 | ARPC5_HUMAN | ARPC5 |
|  | 0.824139828 | -0.08916 | P62318 | P62318 | SMD3_HUMAN | SNRPD3 |
|  | 0.827450286 | 0.048677 | P30041 | P30041 | PRDX6_HUMAN | PRDX6 |
|  | 0.83054041 | -0.06015 | A0A2R8Y619;O60814;P06899;P23527;P33778;P57053;P58876;P62807;Q16778;Q5QNW6;Q8N257;Q93079;Q96A08;Q99877;Q99879;Q99880 | Q96A08;P33778;P62807;P58876;Q93079;P06899;O60814;Q99880;Q99879;Q99877;P23527;Q16778;Q5QNW6;Q8N257;A0A2R8Y619;P57053 | H2B1A_HUMAN;H2B1B_HUMAN;H2B1C_HUMAN;H2B1D_HUMAN;H2B1H_HUMAN;H2B1J_HUMAN;H2B1K_HUMAN;H2B1L_HUMAN;H2B1M_HUMAN;H2B1N_HUMAN;H2B1O_HUMAN;H2B2E_HUMAN;H2B2F_HUMAN;H2B3B_HUMAN;H2BE1_HUMAN;H2BFS_HUMAN | H2BC1;H2BC11;H2BC12;H2BC13;H2BC14;H2BC15;H2BC17;H2BC18;H2BC21;H2BC3;H2BC4;H2BC5;H2BC9;H2BE1;H2BS1;H2BU1 |
|  | 0.838484865 | 0.031606 | Q9UQ80 | Q9UQ80 | PA2G4_HUMAN | PA2G4 |
|  | 0.844366226 | -0.10976 | P35232 | P35232 | PHB_HUMAN | PHB |
|  | 0.846487093 | 0.076132 | P38159;Q96E39 | P38159;Q96E39 | RBMX_HUMAN;RMXL1_HUMAN | RBMX;RBMXL1 |
|  | 0.854606167 | -0.04887 | P61981 | P61981 | 1433G_HUMAN | YWHAG |
|  | 0.868900466 | 0.044738 | P37837 | P37837 | TALDO_HUMAN | TALDO1 |
|  | 0.869334264 | 0.026305 | P06748 | P06748 | NPM_HUMAN | NPM1 |
|  | 0.878787587 | -0.09792 | iRT_peptide5 | iRT_peptide5 | |  |
|  | 0.884043627 | -0.0396 | P61088;Q5JXB2 | P61088;Q5JXB2 | UBE2N_HUMAN;UE2NL_HUMAN | UBE2N;UBE2NL |
|  | 0.891136604 | 0.036495 | P62942 | P62942 | FKB1A_HUMAN | FKBP1A |
|  | 0.891919692 | 0.009453 | O43707 | O43707 | ACTN4_HUMAN | ACTN4 |
|  | 0.896625276 | 0.103544 | P06454 | P06454 | PTMA_HUMAN | PTMA |
|  | 0.897264193 | 0.080554 | P39687 | P39687;O43423 | AN32A_HUMAN | ANP32A |
|  | 0.900756329 | 0.027538 | P25705 | P25705 | ATPA_HUMAN | ATP5F1A |
|  | 0.905600193 | -0.01818 | P60842 | P60842;Q14240 | IF4A1_HUMAN | EIF4A1 |
|  | 0.912716022 | -0.0379 | P31948 | P31948 | STIP1_HUMAN | STIP1 |
|  | 0.914840386 | 0.066702 | P00403 | P00403 | COX2_HUMAN | MT-CO2 |
|  | 0.91576417 | 0.045523 | P07711 | P07711 | CATL1_HUMAN | CTSL |
|  | 0.927959045 | -0.01358 | P50395 | P50395 | GDIB_HUMAN | GDI2 |
|  | 0.929117797 | 0.084569 | O00487 | O00487 | PSDE_HUMAN | PSMD14 |
|  | 0.931311327 | 0.026591 | O75608 | O75608 | LYPA1_HUMAN | LYPLA1 |
|  | 0.931881137 | -0.05667 | P35527 | P35527 | K1C9_HUMAN | KRT9 |
|  | 0.931932987 | 0.017262 | P62805 | P62805 | H4_HUMAN | H4C1 |
|  | 0.932311839 | -0.01173 | P13639 | P13639 | EF2_HUMAN | EEF2 |
|  | 0.943194931 | -0.03113 | Q9Y266 | Q9Y266 | NUDC_HUMAN | NUDC |
|  | 0.955352651 | 0.03323 | P27695 | P27695 | APEX1_HUMAN | APEX1 |
|  | 0.957438207 | -0.01277 | P32119 | P32119 | PRDX2_HUMAN | PRDX2 |
|  | 0.967612522 | 0.005049 | P50991 | P50991 | TCPD_HUMAN | CCT4 |
|  | 0.977872743 | 0.011303 | P07108 | P07108 | ACBP_HUMAN | DBI |
|  | 0.979352438 | -0.00565 | P04264 | P04264;P04259 | K2C1_HUMAN | KRT1 |
|  | 0.985068984 | -0.0056 | P68363 | Q71U36;P68363;Q9BQE3;P0DPH7;P0DPH8;Q6PEY2;P68366;Q9NY65 | TBA1B_HUMAN | TUBA1B |
|  | 0.986967673 | 0.017569 | P09871 | P09871 | C1S_HUMAN | C1S |
|  | 0.987426537 | -0.00231 | P04406 | P04406 | G3P_HUMAN | GAPDH |
|  | 0.991831891 | 0.010586 | P00492 | P00492 | HPRT_HUMAN | HPRT1 |
|  | 0.992736763 | 0.002944 | O00410 | O00410 | IPO5_HUMAN | IPO5 |
|  | 0.994041386 | 0.001725 | P30086 | P30086 | PEBP1_HUMAN | PEBP1 |
|  | 0.994458605 | 0.001646 | P00441 | P00441 | SODC_HUMAN | SOD1 |
|  | 0.994901138 | 0.002311 | P22314 | P22314 | UBA1_HUMAN | UBA1 |
|  | 0.996555836 | -0.00375 | Q16719 | Q16719 | KYNU_HUMAN | KYNU |
|  | 0.999553796 | 0.000313 | P09651;Q32P51 | Q32P51;P09651 | RA1L2_HUMAN;ROA1_HUMAN | HNRNPA1;HNRNPA1L2 |

**Supplementary Table 4.** Proteomics dataset summarizes the significantly altered proteins in the p53-amyloid secretome, identified through statistical filtering (p < 0.05, fold-change cutoff)

| S.No. | log2(fold_change) | Protein.Group | Protein.Ids | Protein.Names | Genes |
| --- | --- | --- | --- | --- | --- |
|  | 3.045962 | O00204 | O00204 | ST2B1_HUMAN | SULT2B1 |
|  | 3.003377 | Q8NDH2 | Q8NDH2 | CC168_HUMAN | CCDC168 |
|  | 2.993109 | P02768 | P02768 | ALBU_HUMAN | ALB |
|  | 2.958909 | P0C0L4;P0C0L5 | P0C0L4;P0C0L5 | CO4A_HUMAN;CO4B_HUMAN | C4A;C4B |
|  | 2.889652 | Q9C0B2 | Q9C0B2 | CFA74_HUMAN | CFAP74 |
|  | 2.864616 | P02788 | P02788 | TRFL_HUMAN | LTF |
|  | 2.726 | Q8N165 | Q8N165 | PDK1L_HUMAN | PDIK1L |
|  | 2.696681 | P01023 | P01023 | A2MG_HUMAN | A2M |
|  | 2.432141 | P09603 | P09603 | CSF1_HUMAN | CSF1 |
|  | 2.251634 | Q14118 | Q14118 | DAG1_HUMAN | DAG1 |
|  | 2.036341 | P19823 | P19823 | ITIH2_HUMAN | ITIH2 |
|  | 1.866414 | P01024 | P01024 | CO3_HUMAN | C3 |
|  | 1.721365 | P61916 | P61916 | NPC2_HUMAN | NPC2 |
|  | 1.597567 | P10909 | P10909 | CLUS_HUMAN | CLU |
|  | 1.576934 | P02647 | P02647 | APOA1_HUMAN | APOA1 |
|  | 1.553301 | P53634 | P53634 | CATC_HUMAN | CTSC |
|  | 1.523699 | Q12805 | Q12805 | FBLN3_HUMAN | EFEMP1 |
|  | 1.498824 | P03973 | P03973 | SLPI_HUMAN | SLPI |
|  | 1.495403 | P18827 | P18827 | SDC1_HUMAN | SDC1 |
|  | 1.425015 | P28799 | P28799 | GRN_HUMAN | GRN |
|  | 1.424283 | P02656 | P02656 | APOC3_HUMAN | APOC3 |
|  | 1.323665 | P08253 | P08253 | MMP2_HUMAN | MMP2 |
|  | 1.303279 | O94985 | O94985 | CSTN1_HUMAN | CLSTN1 |
|  | 1.301044 | P07996 | P07996 | TSP1_HUMAN | THBS1 |
|  | 1.283821 | Q08380 | Q08380 | LG3BP_HUMAN | LGALS3BP |
|  | 1.243794 | Q9H3G5 | Q9H3G5 | CPVL_HUMAN | CPVL |
|  | 1.232521 | P10619 | P10619 | PPGB_HUMAN | CTSA |
|  | 1.214125 | P01008 | P01008 | ANT3_HUMAN | SERPINC1 |
|  | 1.174474 | P23142 | P23142 | FBLN1_HUMAN | FBLN1 |
|  | 1.105654 | P01033 | P01033 | TIMP1_HUMAN | TIMP1 |
|  | 1.095448 | Q9HC38 | Q9HC38 | GLOD4_HUMAN | GLOD4 |
|  | 1.0711 | P07602 | P07602 | SAP_HUMAN | PSAP |
|  | 1.037527 | P07858 | P07858 | CATB_HUMAN | CTSB |
|  | 1.029123 | P07339 | P07339 | CATD_HUMAN | CTSD |
|  | 0.939782 | P02751 | P02751 | FINC_HUMAN | FN1 |
|  | 0.723011 | P18065 | P18065 | IBP2_HUMAN | IGFBP2 |
|  | 0.651095 | P12109 | P12109 | CO6A1_HUMAN | COL6A1 |
|  | 0.650305 | Q15582 | Q15582 | BGH3_HUMAN | TGFBI |
|  | 0.604771 | Q9NTK5 | Q9NTK5 | OLA1_HUMAN | OLA1 |
|  | 0.581768 | O00391 | O00391 | QSOX1_HUMAN | QSOX1 |
|  | 0.440709 | P08195 | P08195 | 4F2_HUMAN | SLC3A2 |
|  | 0.436203 | P68371 | P68371 | TBB4B_HUMAN | TUBB4B |
|  | 0.321414 | P26447 | P26447 | S10A4_HUMAN | S100A4 |
|  | 0.197939 | P60709;P63261 | P60709;P63261 | ACTB_HUMAN;ACTG_HUMAN | ACTB;ACTG1 |
|  | 0.134314 | Q06830 | Q06830 | PRDX1_HUMAN | PRDX1 |
|  | -0.27045 | P16402 | P16402 | H13_HUMAN | H1-3 |
|  | -0.28376 | P31946 | P31946 | 1433B_HUMAN | YWHAB |
|  | -0.28903 | P15531 | O60361;P15531;P22392 | NDKA_HUMAN | NME1 |
|  | -0.33053 | P68104;Q5VTE0 | P68104;Q5VTE0 | EF1A1_HUMAN;EF1A3_HUMAN | EEF1A1;EEF1A1P5 |
|  | -0.40734 | P06753 | P06753 | TPM3_HUMAN | TPM3 |
|  | -0.41357 | P09429 | P09429 | HMGB1_HUMAN | HMGB1 |
|  | -0.42015 | P19338 | P19338 | NUCL_HUMAN | NCL |
|  | -0.43045 | Q01105 | P0DME0;Q01105 | SET_HUMAN | SET |
|  | -0.43879 | P55884 | P55884 | EIF3B_HUMAN | EIF3B |
|  | -0.46591 | Q14554 | Q14554 | PDIA5_HUMAN | PDIA5 |
|  | -0.50996 | P29692 | P29692 | EF1D_HUMAN | EEF1D |
|  | -0.51841 | P53396 | P53396 | ACLY_HUMAN | ACLY |
|  | -0.61057 | P02545 | P02545 | LMNA_HUMAN | LMNA |
|  | -0.65699 | P22626 | P22626 | ROA2_HUMAN | HNRNPA2B1 |
|  | -0.67275 | Q9UK76 | Q9UK76 | JUPI1_HUMAN | JPT1 |
|  | -0.673 | P20700 | P20700 | LMNB1_HUMAN | LMNB1 |
|  | -0.69368 | Q9UHD8 | Q9UHD8 | SEPT9_HUMAN | SEPTIN9 |
|  | -0.698 | P05387 | P05387 | RLA2_HUMAN | RPLP2 |
|  | -0.70225 | Q96AE4 | Q96AE4 | FUBP1_HUMAN | FUBP1 |
|  | -0.85039 | P08670 | P08670 | VIME_HUMAN | VIM |
|  | -0.86738 | P61604 | P61604 | CH10_HUMAN | HSPE1 |
|  | -0.88618 | O60361 | O60361 | NDK8_HUMAN | NME2P1 |
|  | -0.90972 | P59998 | P59998 | ARPC4_HUMAN | ARPC4 |
|  | -0.94911 | P30101 | P30101 | PDIA3_HUMAN | PDIA3 |
|  | -0.95037 | P14625 | P14625 | ENPL_HUMAN | HSP90B1 |
|  | -0.952 | P60903 | P60903 | S10AA_HUMAN | S100A10 |
|  | -0.97966 | P49411 | P49411 | EFTU_HUMAN | TUFM |
|  | -1.11709 | Q13442 | Q13442 | HAP28_HUMAN | PDAP1 |
|  | -1.17117 | P11021 | P11021 | BIP_HUMAN | HSPA5 |
| 75. | -1.7125 | Q15084 | Q15084 | PDIA6_HUMAN | PDIA6 |
| 76. | -1.82382 | P16401 | P16401 | H15_HUMAN | H1-5 |

**Supplementary Table 5. Computational docking-based binding affinity profiling of CLU and ITIH2 against common oral cancer treatment drugs**

| **S.No.** | **Drug** | **Binding affinity (CLU)** | **Binding affinity (ITIH2)** |
| --- | --- | --- | --- |
| 1 | Methoxerate | -6.1 | -7.7 |
| 2 | Docetaxel | -7.1 | -8.4 |
| 3 | 5FU | -4.3 | -5.4 |
| 4 | Bleomycin | -6.6 | -8.1 |

**Supplementary Table 6. List of all qPCR primers used in the study**

| **Gene name** | **Sequence** |
| --- | --- |
| **PARP-1** |  |
| Forward | CCAAGCCAGTTCAGGACCTCAT |
| Reverse | GGATCTGCCTTTTGCTCAGCTTC |
| **BAD** |  |
| Forward | CCAACCTCTGGGCAGCACAGC |
| Reverse | TTTGCCGCATCTGCGTTGCTGT |
| **PUMA** |  |
| Forward | ACGACCTCAACGCACAGTACGA |
| Reverse | CCTAATTGGGCTCCATCTCGGG |
| P53 |  |
| Forward |  |
| Reverse |  |
| NCAD |  |
| Forward | GACGGTTCGCCATCCAGAC |
| Reverse | TCGATTGGTTTGACCACGG |
| Ecad |  |
| Forward | GAACAGCACGTACACAGCCCT |
| Reverse | GCAGAAGTGTCCCTGTTCCAG |
| Vimentin |  |
| Forward | CGGGAGAAATTGCAGGAGGA |
| Reverse | AAGGTCAAGACGTGCCAGAG |
| smad4 |  |
| Forward | ACAGTGAAA AACAACAGCTAACG |
| Reverse | TCGCCGCTGCGGTTATC |
| SOX2 |  |
| Forward | GCCGAGTGGAAACTTTTGTCG |
| Reverse | GCAGCGTGTACTTATCCTTCTT |
| OCT |  |
| Forward | CGTGAAGCTGGAGAAGGAGA |
| Reverse | CATCGGCCTGTGTATATCCC |
| CLU |  |
| Forward | AGGAACTCCTCAAGCTGG |
| Reverse | GCCCTAAATGAGACCAGG |
| ITIH2 |  |
| Forward | ACATGGAGCCACTCACATC |
| Reverse | CTGGTGAACTGGAGGTGTT |
| GADD45 |  |
| Forward | TGTGGTACAGAACATGTCTAAGC |
| Reverse | TGCAGATGTAGGTAGGGAGTAG |
| SDC4 |  |
| Forward | GTTATCTAGAGGCACCAAGG |
| Reverse | AAGGCCGATACTTCTCCG |
| HBA1 |  |
| Forward | CAAGAAGCATGGCCACC |
| Reverse | CGGTCAACTTCAAGCTCC |
| NPC2 |  |
| Forward | GAACCGCAGTCCTTGAAC |
| Reverse | AGGTTTGTCTTGTGACCG |
| AHNAK |  |
| Forward | TCGGTCACAACCTGAGG |
| Reverse | ACTCGGAGCTGCTCTG |
| BLMH |  |
| Forward | GGAGGGCAGTATCACTCAG |
| Reverse | CCATGGCCACAAAGGTTAC |
| NFKB2 |  |
| Forward | TTC CTT CAC CTC TGC TGT G |
| Reverse | TAG AGG AGG GAG TGA GGC T |
