# Supplementary material for: Secretome proteomics-based targeting of inter-alpha-trypsin inhibitor heavy chain H2 (ITIH2) and clusterin (Clu) mitigates p53 amyloid–mediated tumorigenesis in oral carcinoma
Source: Research Square preprint supplement (doi:10.21203/rs.3.rs-8727350/v1), 2026-02-19
Supplement: Supplementary file 2 [file 5d418e8b93f68e347d92a2dd.docx]

**Table 1. List of patient details included in the study.**

| **Patient No.** | **Grade** | **Status** | **Organ** | **Age** | **Sex** |
| --- | --- | --- | --- | --- | --- |
| P1 (8614) | Tumor | Primary | Tongue | 52 | Male |
| P2 (0714) | Tumor |  | L. alveolus | 22 | Male |
| P3 (0286) | Tumor | Recurrent | Neck Node | 38 | Male |
| P4 (7911) | Tumor | Primary | Tongue | 61 | Male |
| P5 (810494) | Tumor | Recurrent | Tongue | 37 | Male |
| P6 (0809966) | Tumor | Recurrent | Tongue | 51 | Male |
| N1 (8614) | Normal | Normal | Tongue | 52 | Male |
| N2(4852) | Normal | Normal | Tongue | 57 | Female |
